# Supplementary material for: Zr(iv) complexes containing salan-type ligands: synthesis, structural characterization and role as catalysts towards the polymerization of ε-caprolactone, rac-lactide, ethylene, homopolymerization and copolymerization of epoxides with CO2
Source: Royal Society of Chemistry journal article supplement (doi:10.1039/c4ra17201a), 2015-01-01
Supplement: c4ra17201a1.pdf [file c4ra17201a1.pdf]

## Supporting Information

**Zr(IV) complexes containing salan-type ligands: Synthesis, structural characterization and role as catalysts towards the polymerization of  $\epsilon$ -caprolactone, *rac*-lactide, ethylene, homopolymerization and copolymerization of epoxides with CO<sub>2</sub>**

Mrinmay Mandal,<sup>a</sup> Debashis Chakraborty\*<sup>a</sup> and Venkatachalam Ramkumar<sup>b</sup>

<sup>a</sup>Department of Chemistry, Indian Institute of Technology Patna, Patna-800 013, Bihar, India. Tel: +91 6122552171.  
E-mail address: dc@iitp.ac.in; debashis.iitp@gmail.com (D. Chakraborty).

<sup>b</sup>Department of Chemistry, Indian Institute of Technology Madras, Chennai 600036, Tamil Nadu, India.

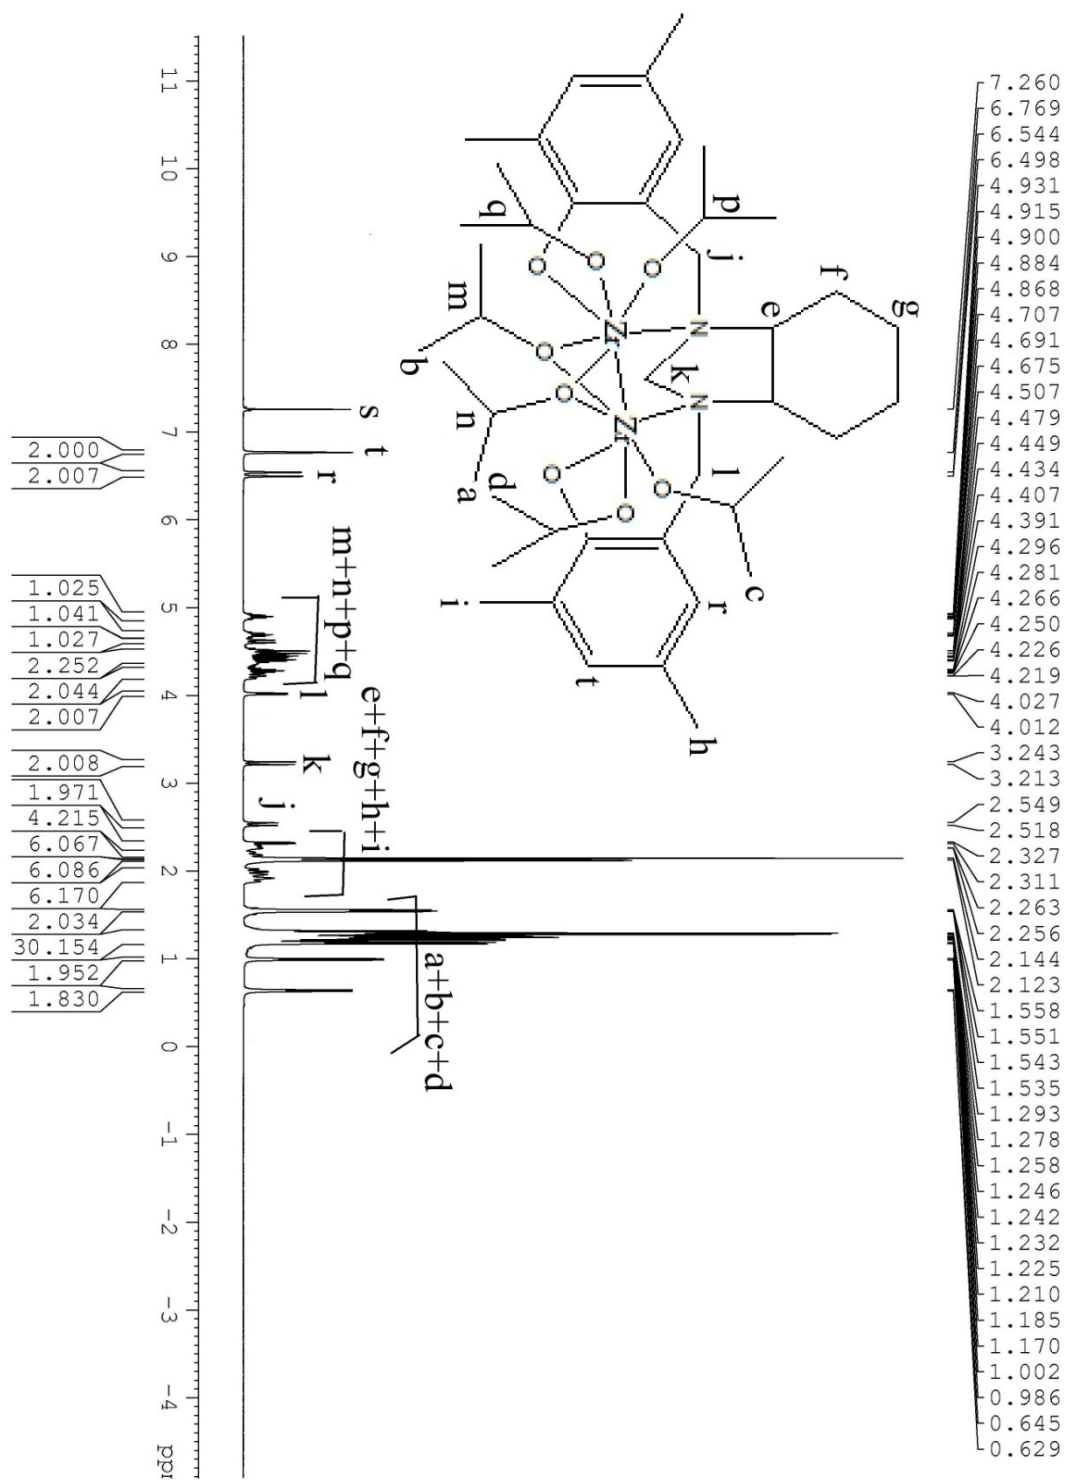

**Fig. S1** <sup>1</sup>H NMR (400 MHz, CDCl<sub>3</sub>) of Compound 1

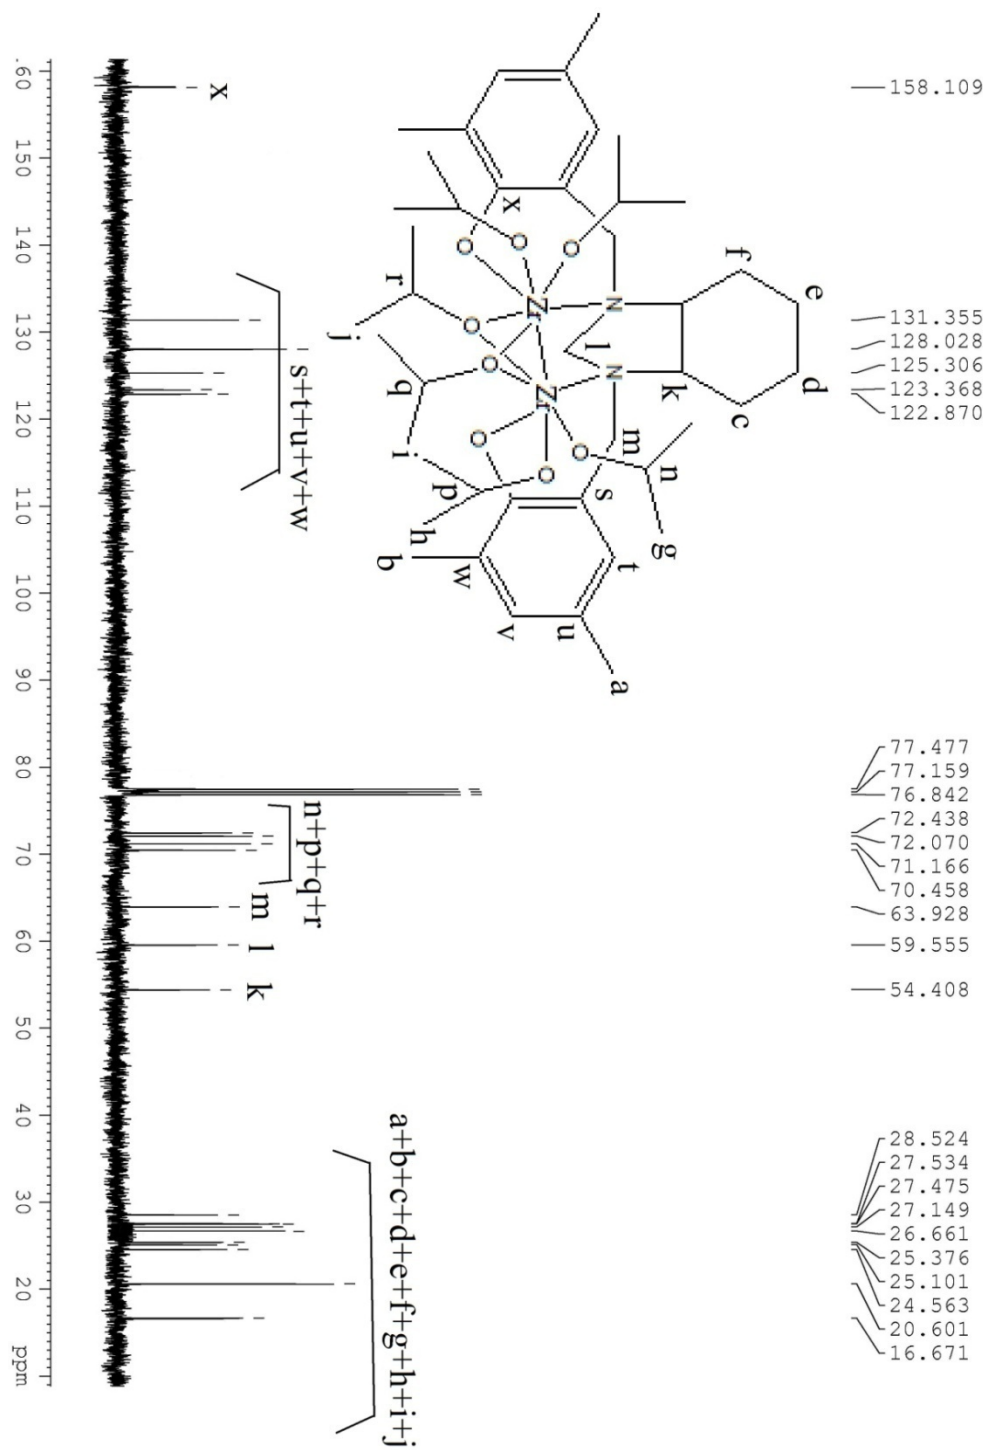

Fig. S2  $^{13}\text{C}$  NMR (100 MHz,  $\text{CDCl}_3$ ) of Compound 1

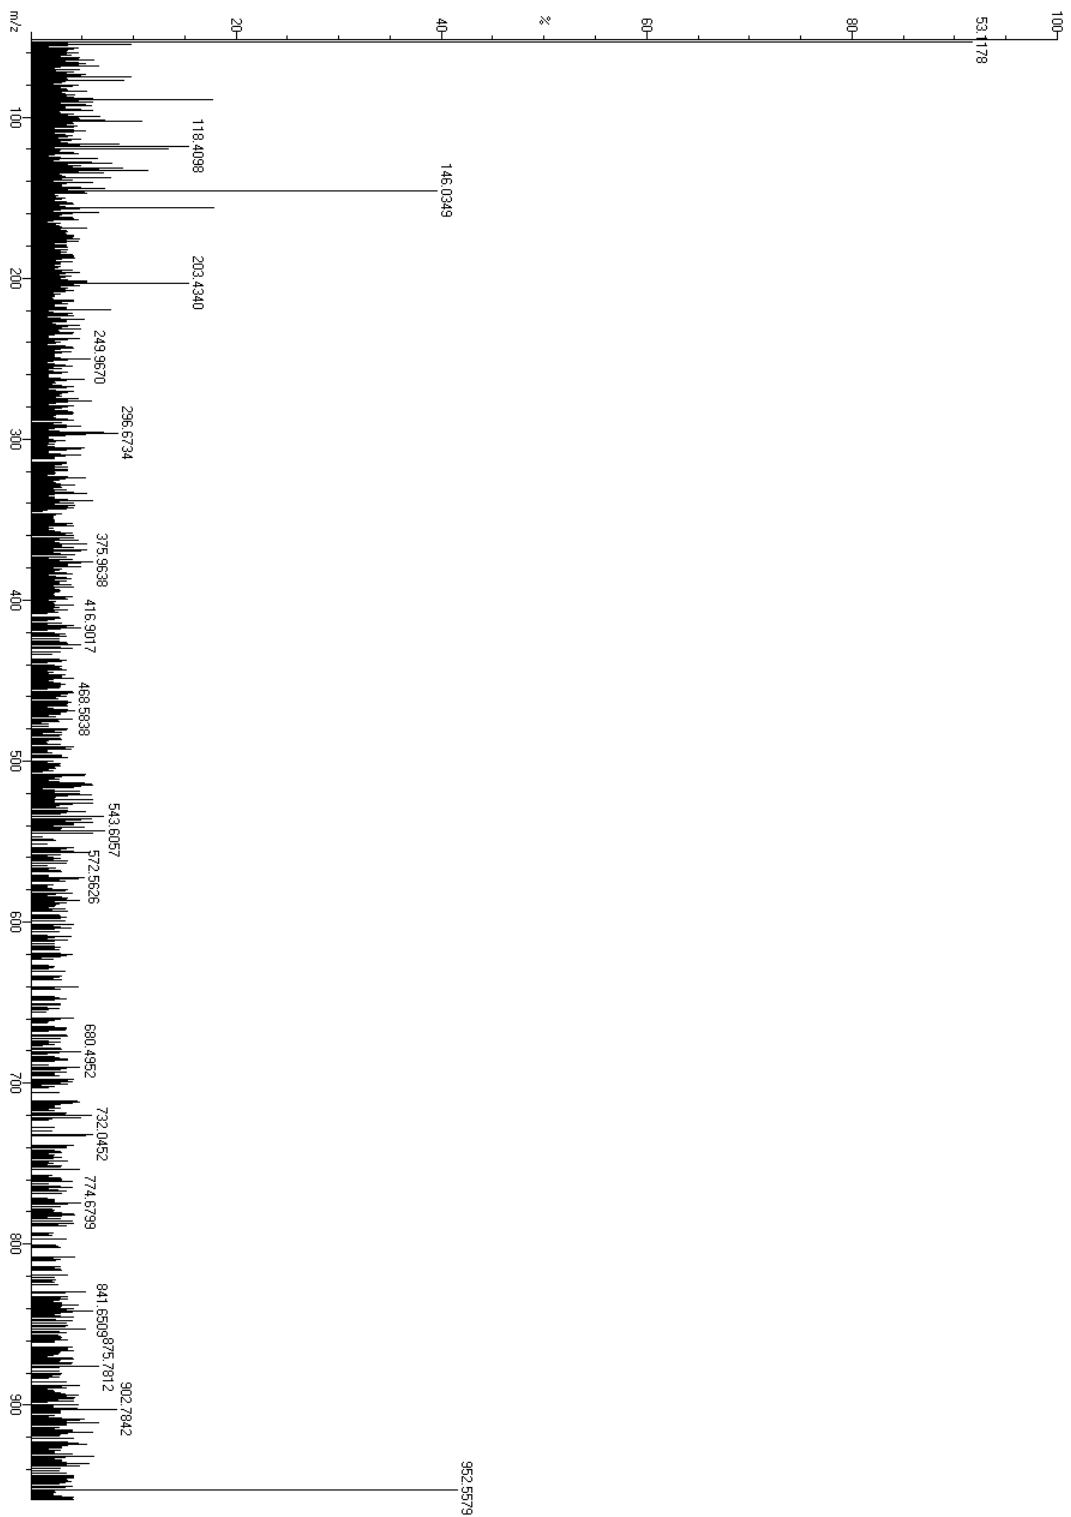

**Fig. S3** ESI-Mass Spectrum of Compound 1

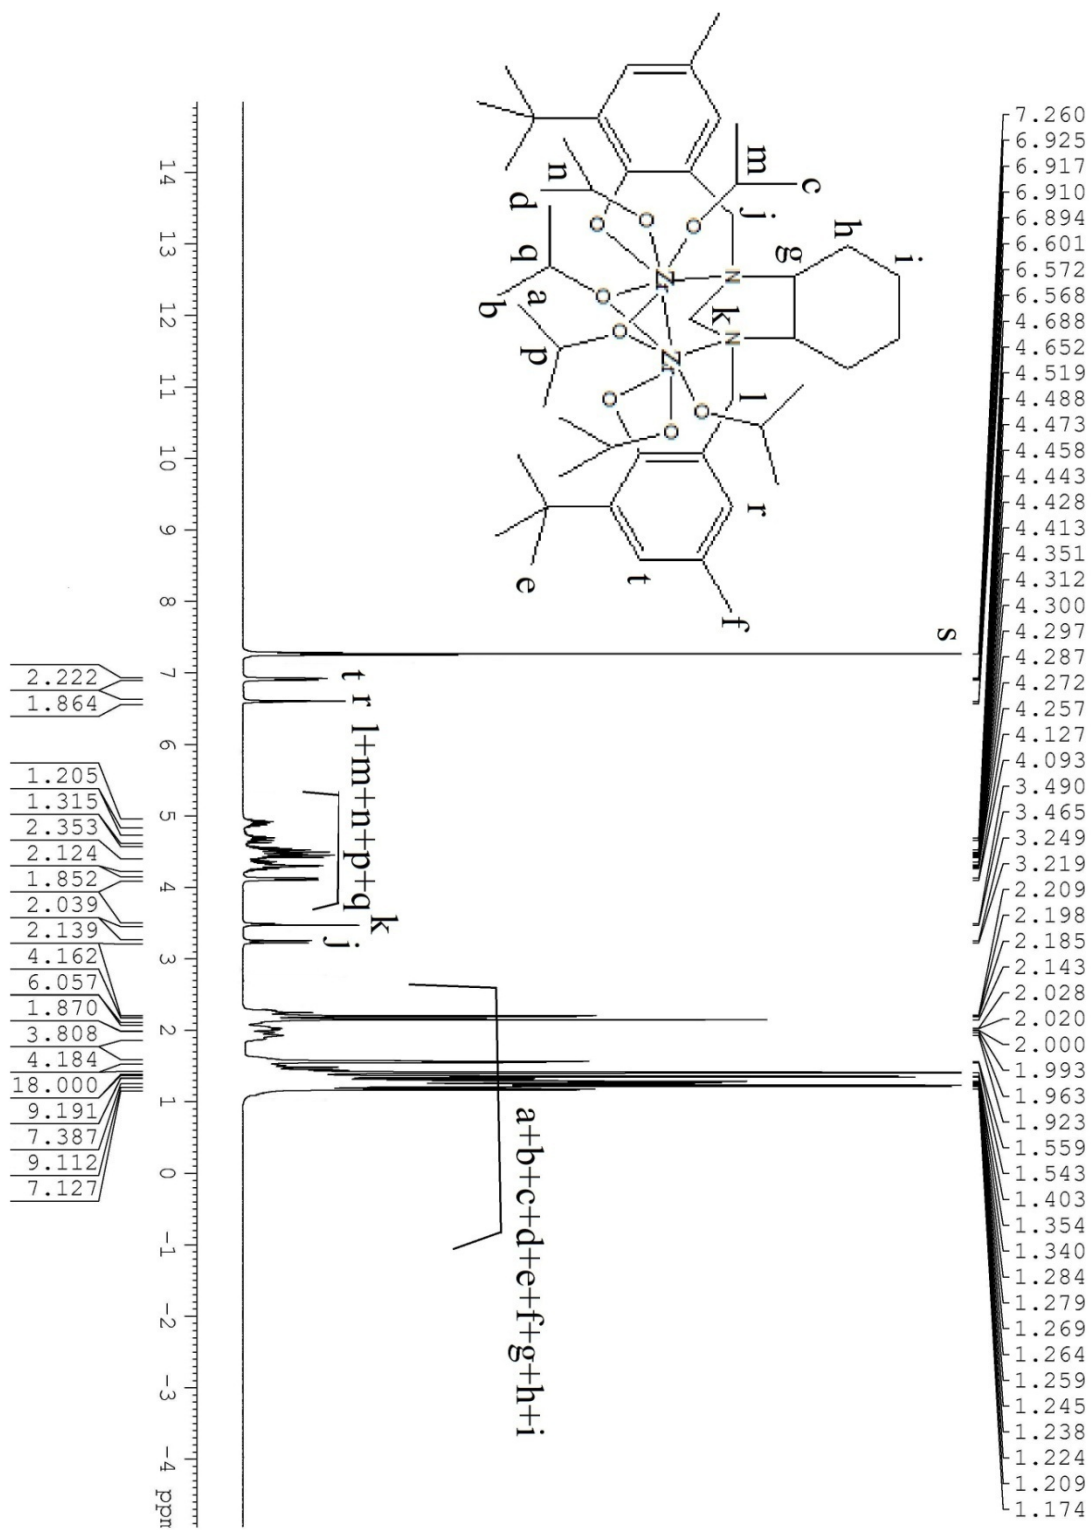

Fig. S4 <sup>1</sup>H NMR (400 MHz, CDCl<sub>3</sub>) of Compound 2

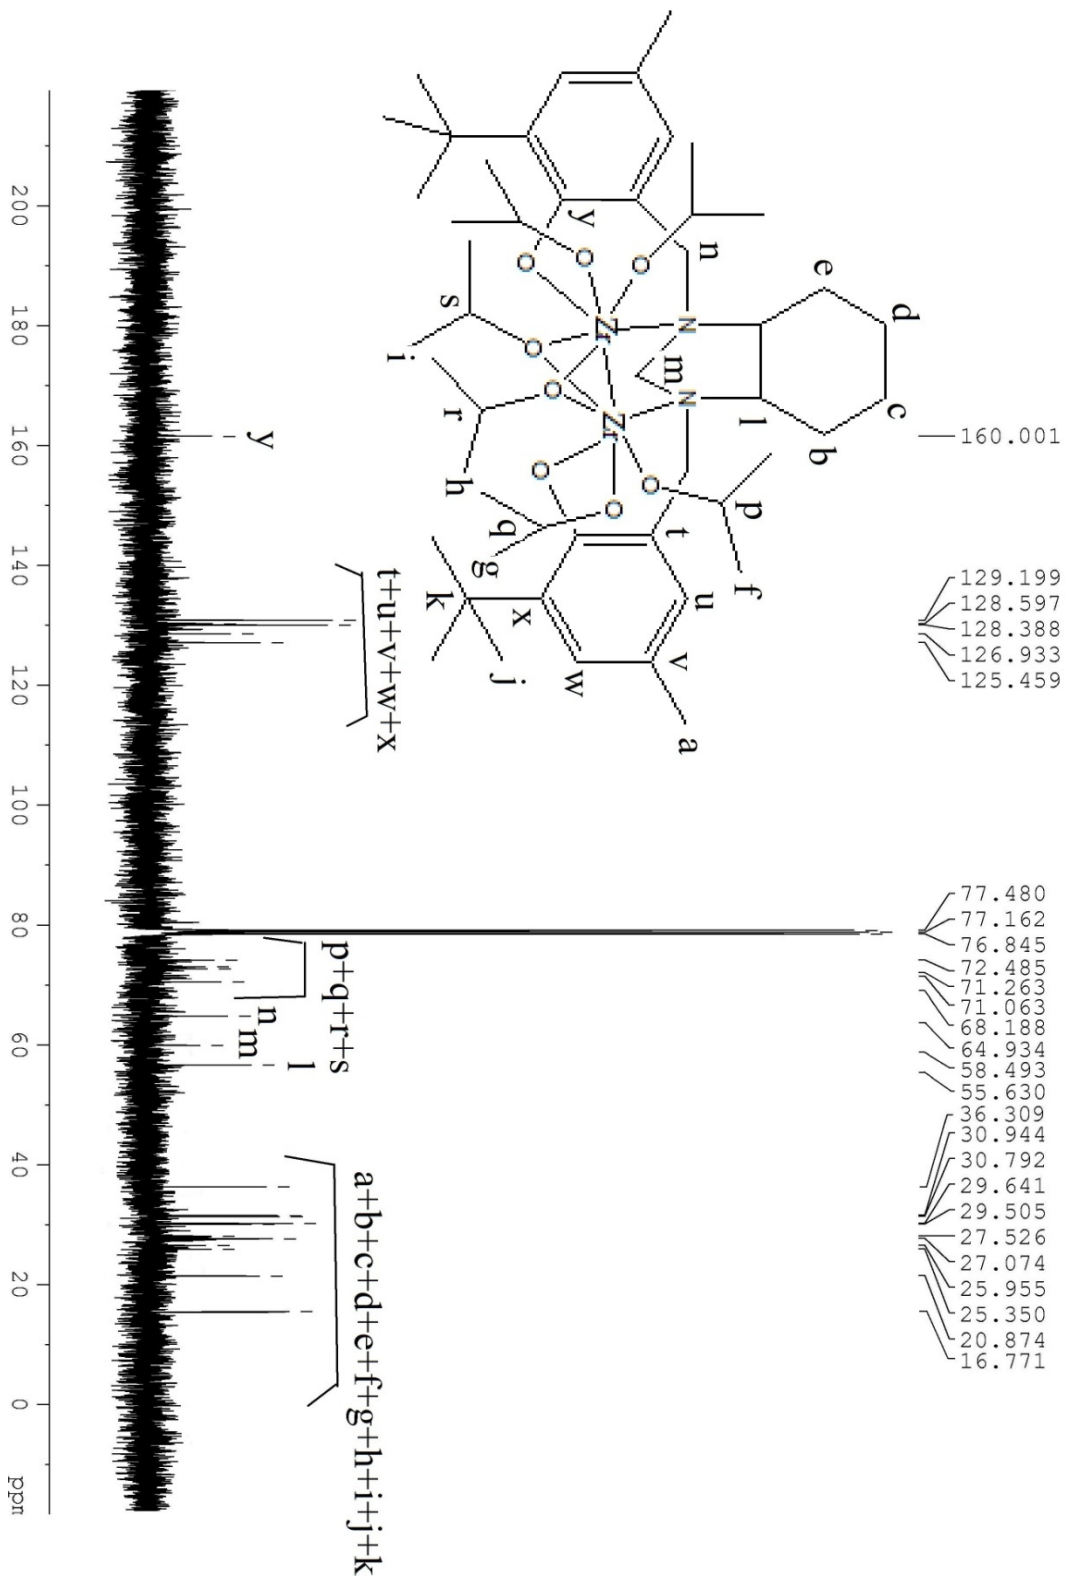

Fig. S5  $^{13}\text{C}$  NMR (100 MHz,  $\text{CDCl}_3$ ) of Compound 2

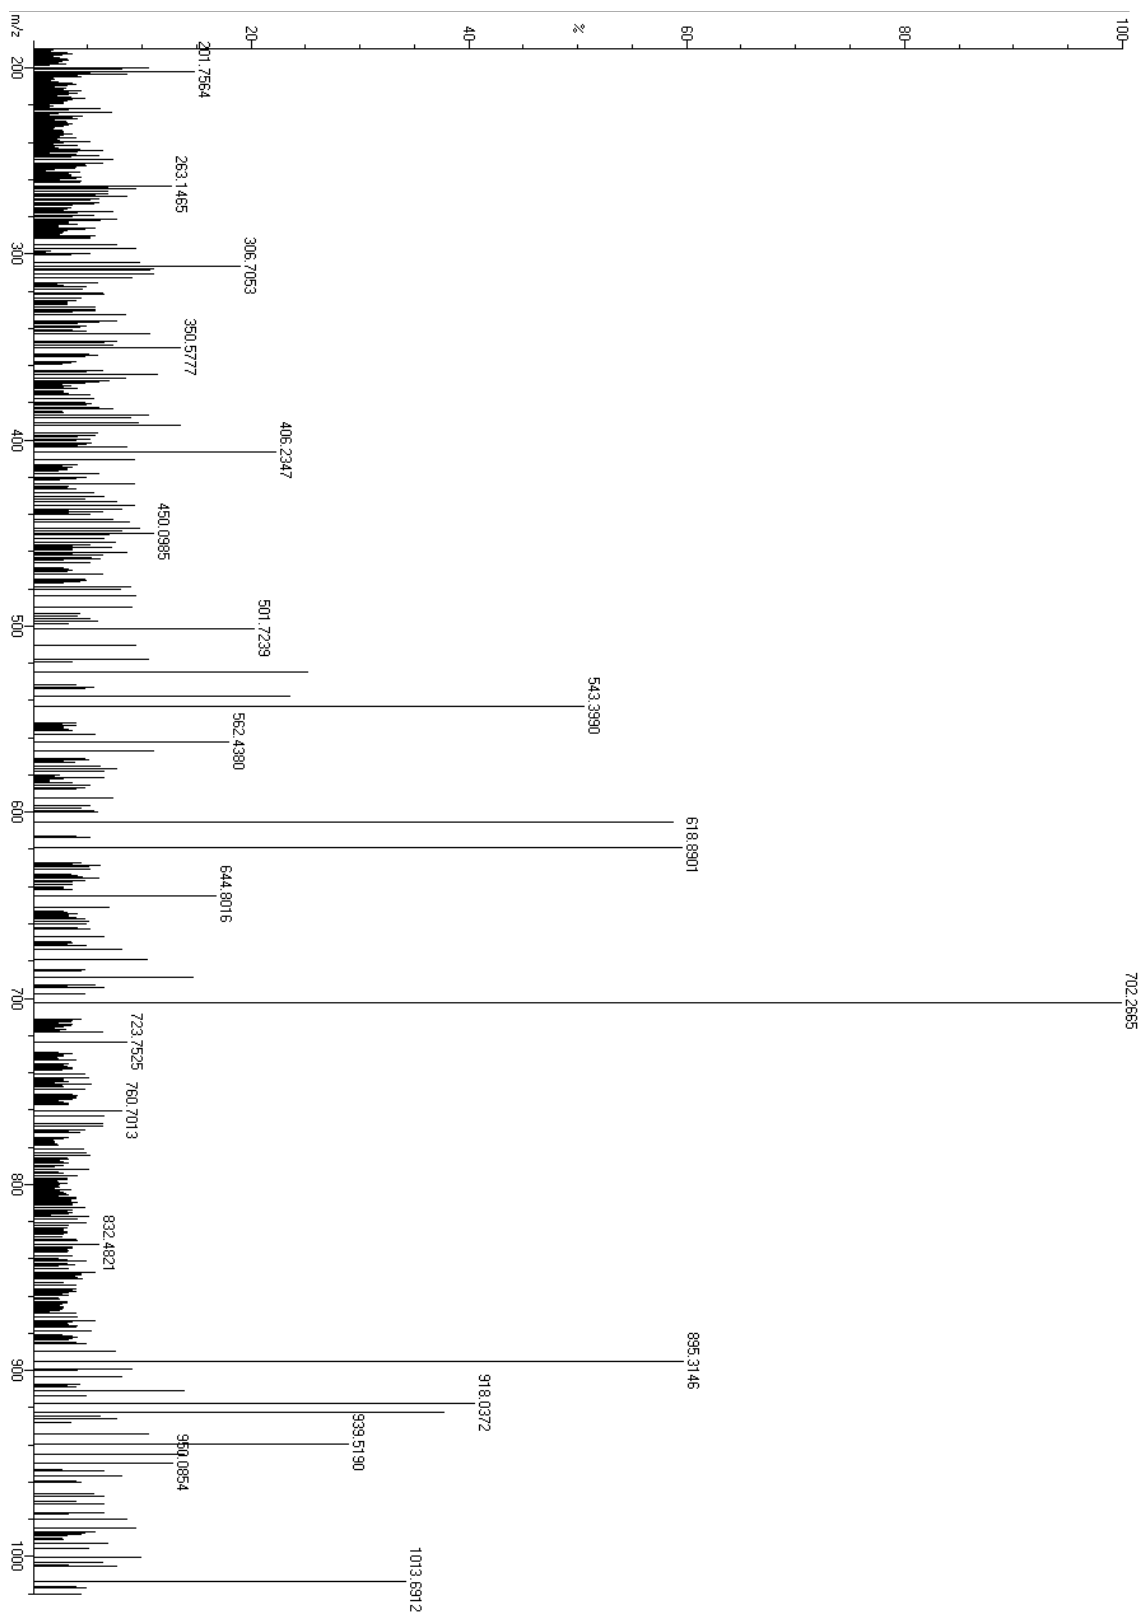

**Fig. S6** ESI-Mass Spectrum of Compound 2

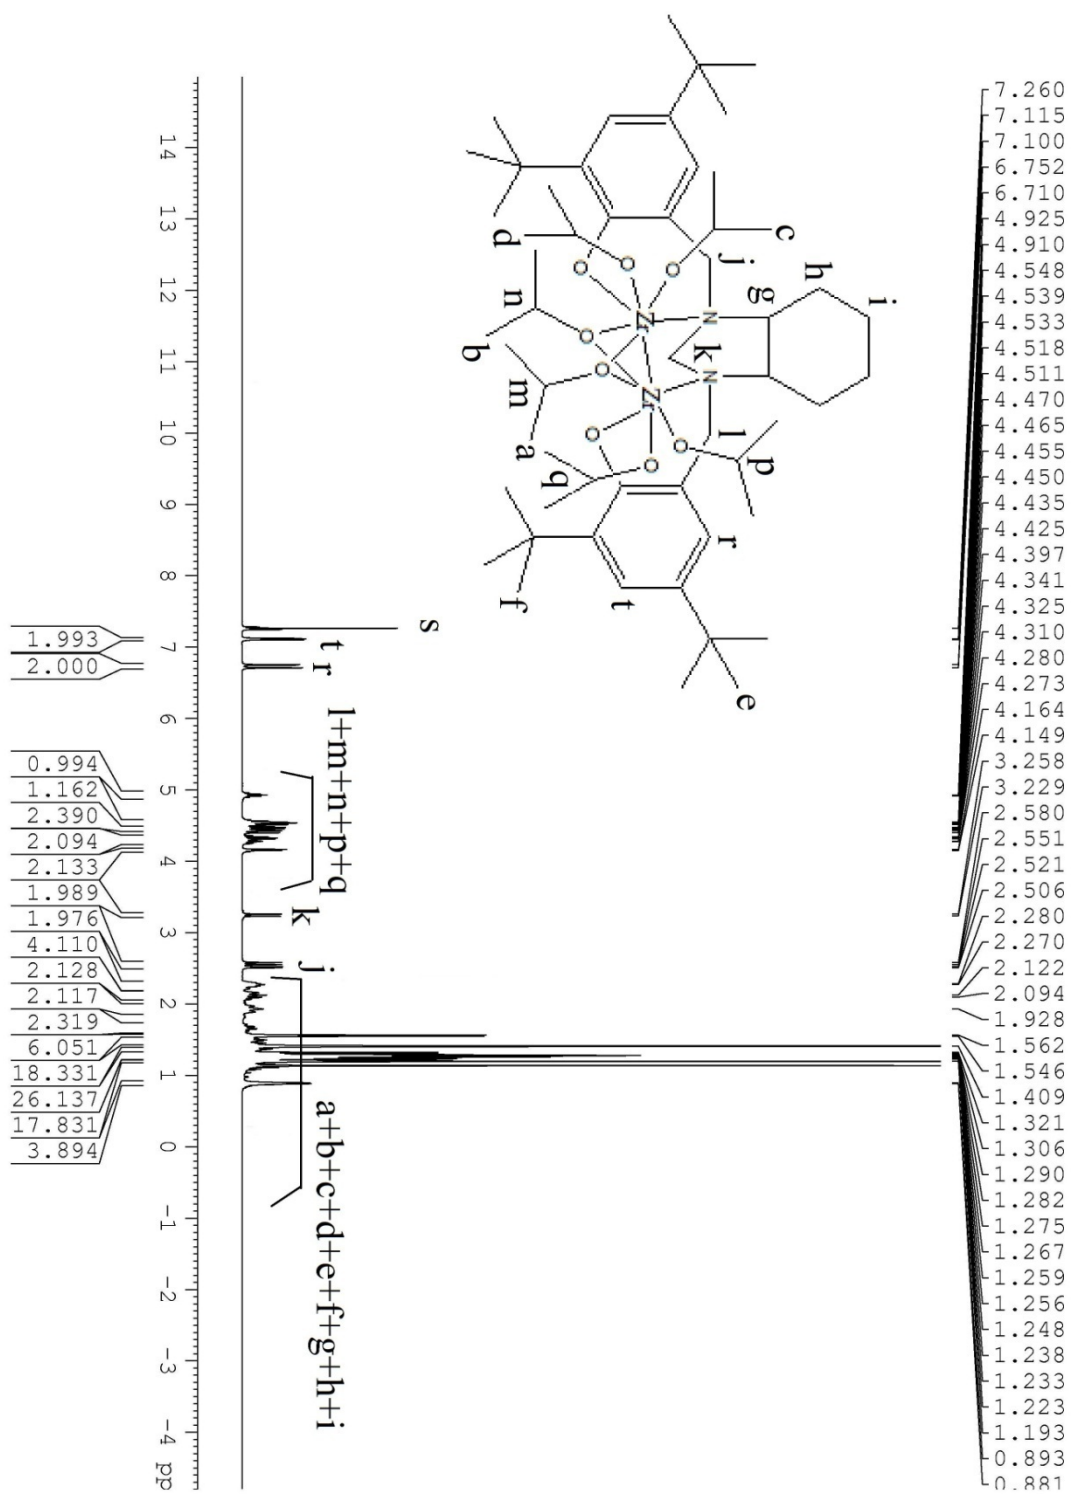

**Fig. S7** <sup>1</sup>H NMR (400 MHz, CDCl<sub>3</sub>) of Compound **3**



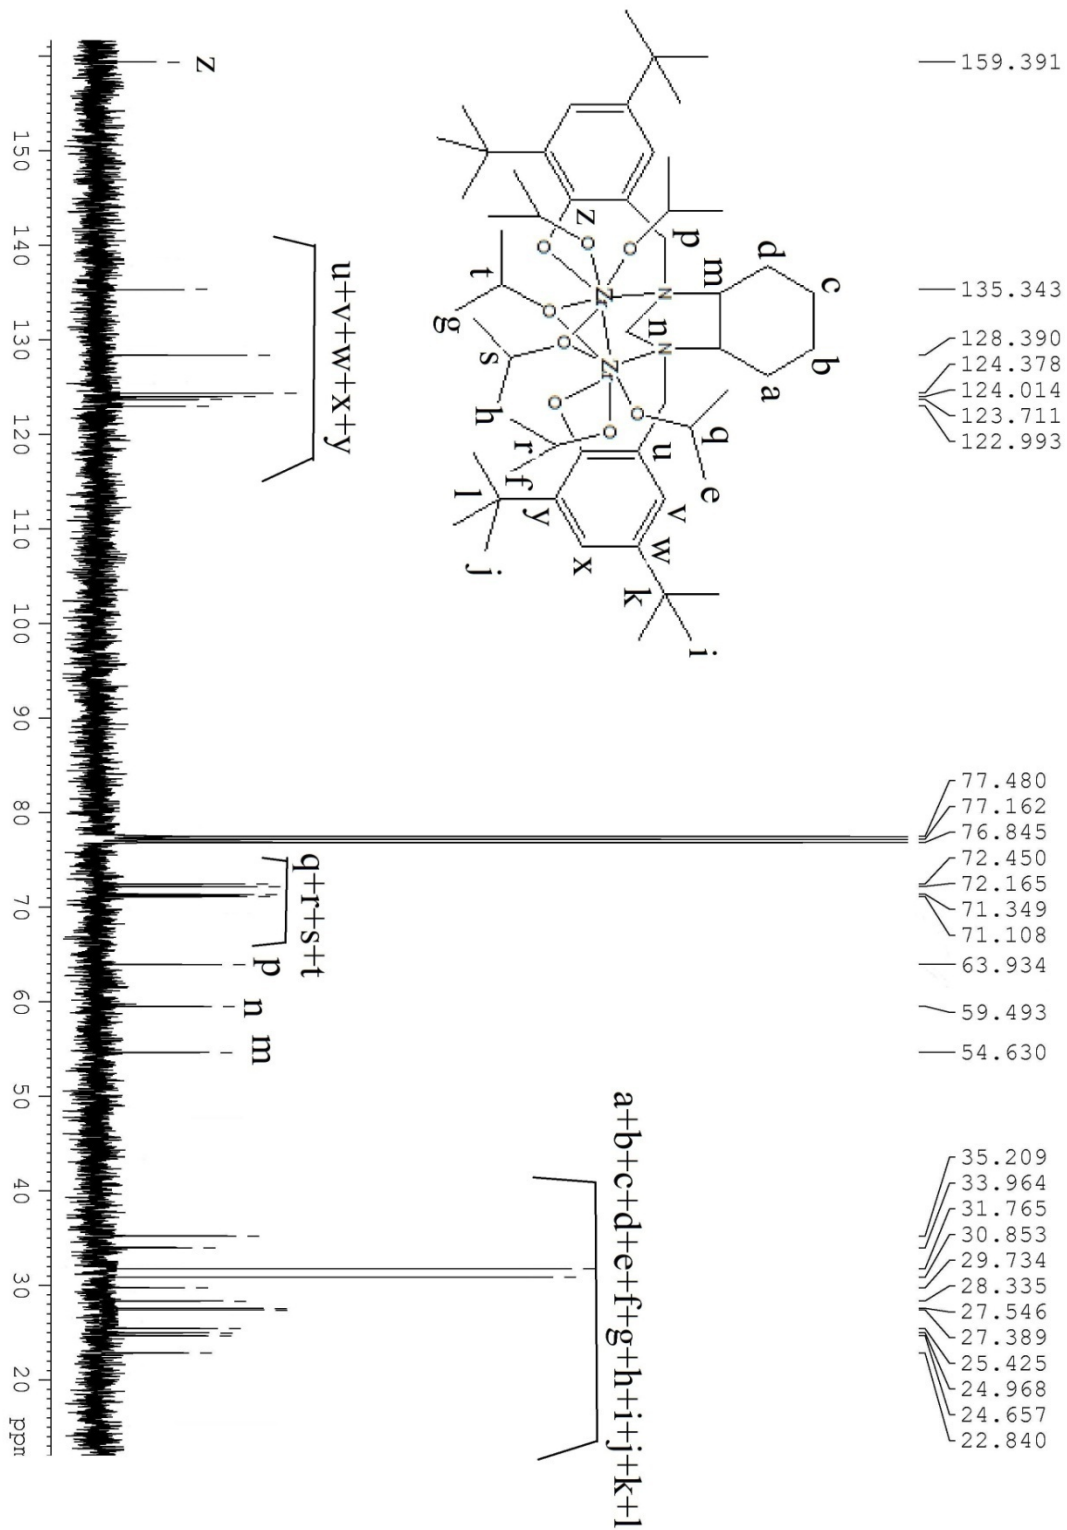

Fig. S8  $^{13}\text{C}$  NMR (100 MHz,  $\text{CDCl}_3$ ) of Compound 3

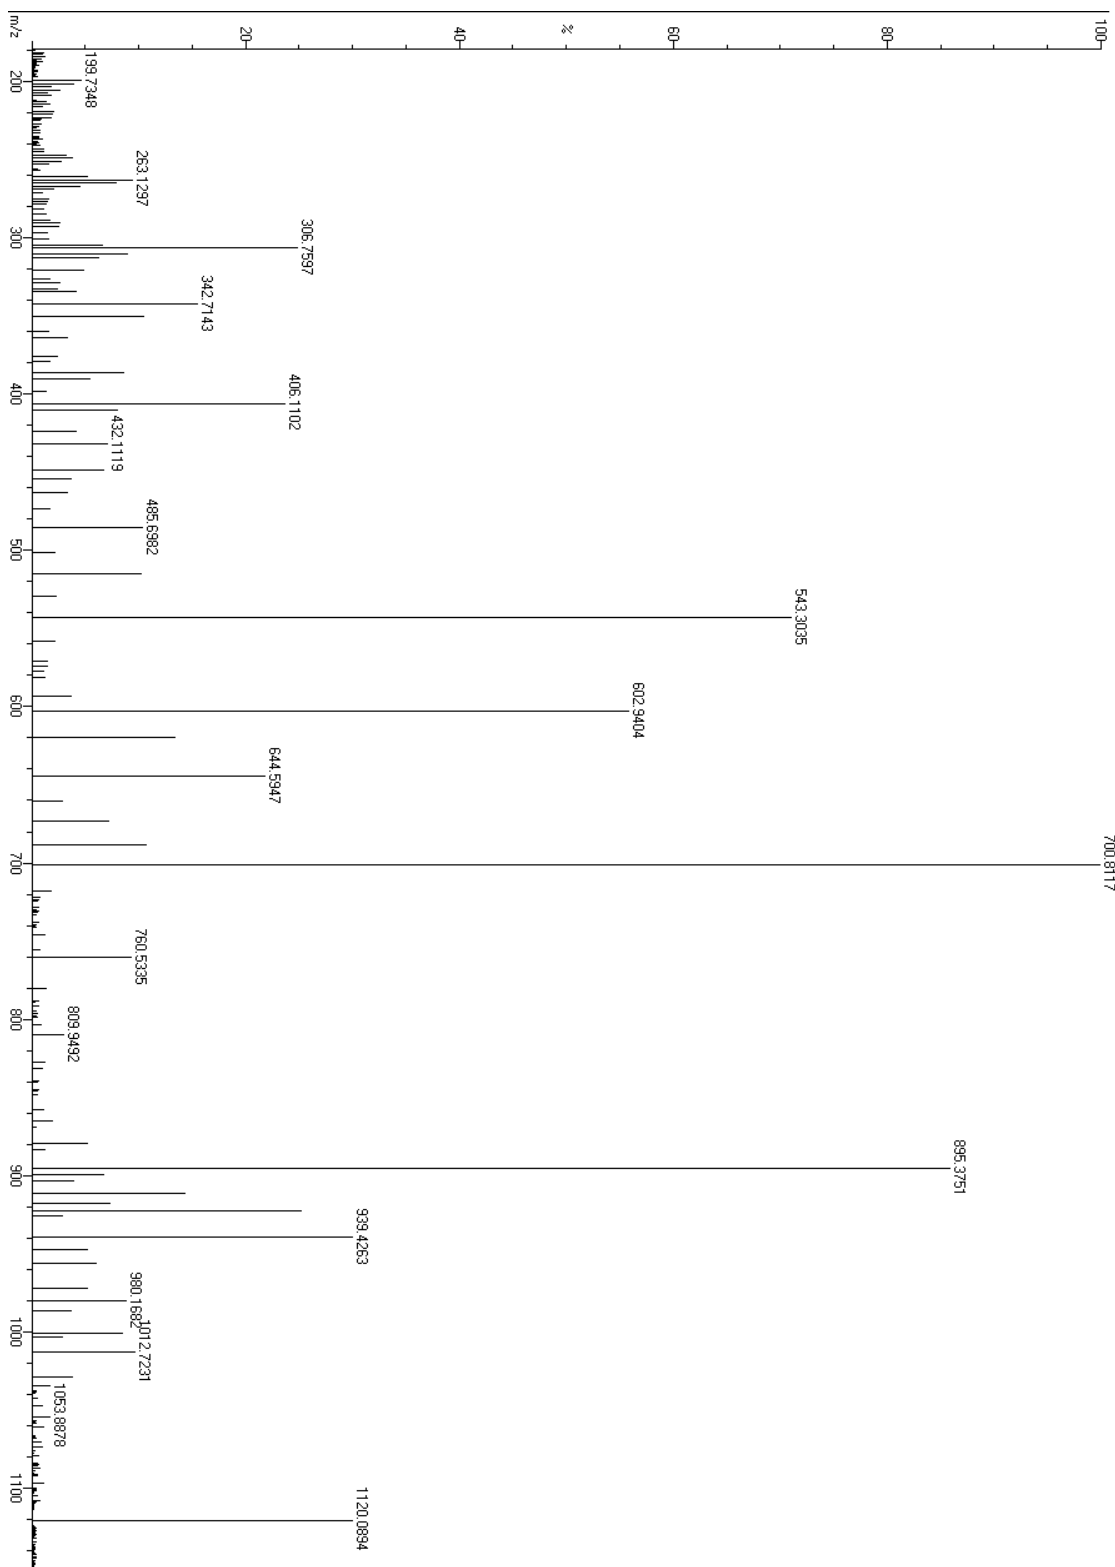

**Fig. S9** ESI-Mass Spectrum of Compound 3

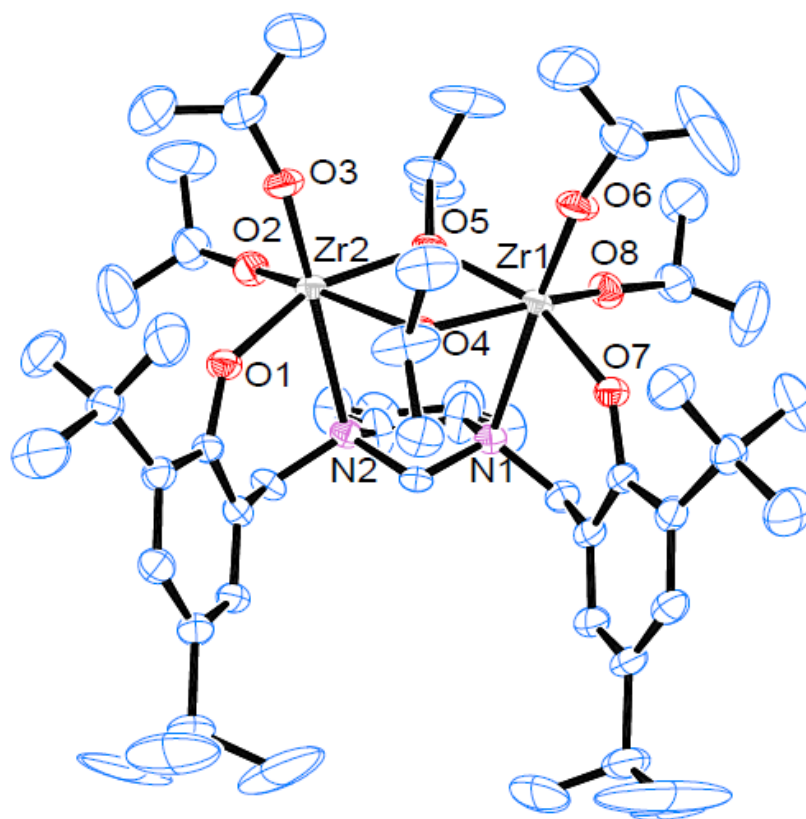

**Fig. S10** Molecular structure of **3**; thermal ellipsoids were drawn at 30 % probability level. Selected bond lengths (Å) and bond angles (°): Zr(2)-O(1) 2.015(2), O(2)-Zr(2) 1.937(3), O(5)-Zr(2) 2.173(2), O(5)-Zr(1) 2.185(2), O(8)-Zr(1) 1.941(3), N(1)-Zr(1) 2.573(3), O(8)-Zr(1)-O(7) 97.28(11), O(3)-Zr(2)-O(1) 96.72(11), O(8)-Zr(1)-N(1) 83.81(10), O(2)-Zr(2)-Zr(1) 97.95(11), O(8)-Zr(1)-Zr(2) 124.27(9), N(1)-Zr(1)-Zr(2) 76.55(6), O(6)-Zr(1)-O(7) 95.25(11), O(7)-Zr(1)-O(4) 94.72(9), Zr(2)-O(5)-Zr(1) 109.00(10).

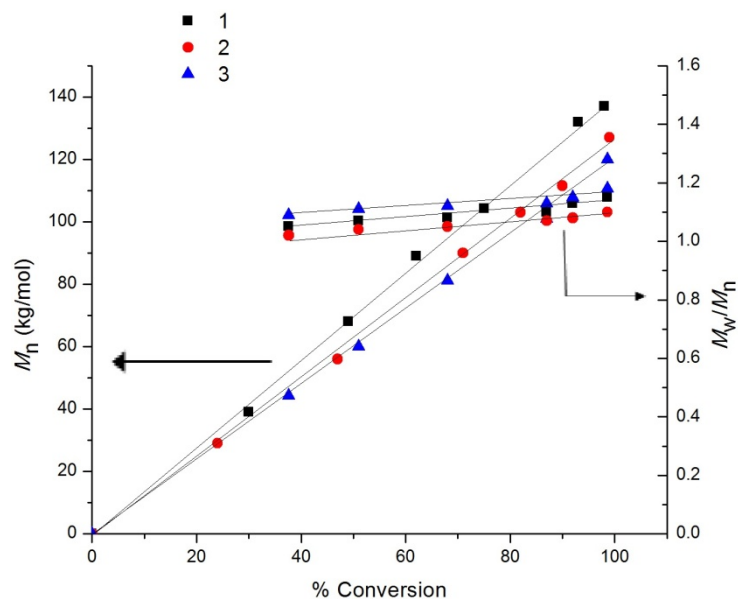

**Fig. S11** Plot of  $M_n$  and  $M_w/M_n$  vs. % conversion for *rac*-LA polymerization at 140 °C using **1**, **2** and **3**.

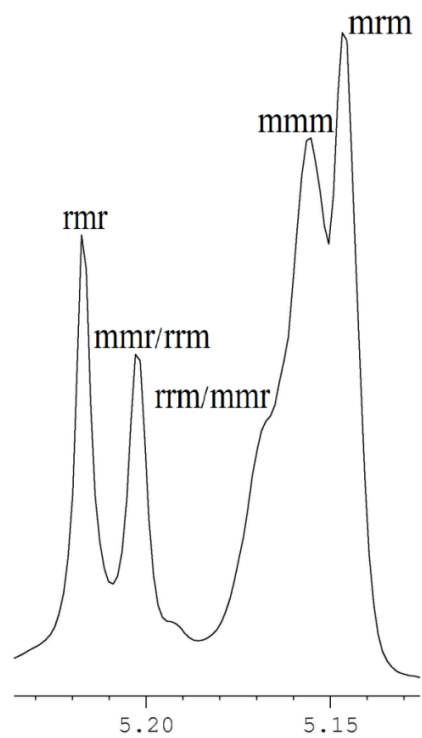

**Fig. S12** Homonuclear decoupled <sup>1</sup>H NMR spectra of *rac*-LA in 15:1 ratio using by **1** in CDCl<sub>3</sub>.

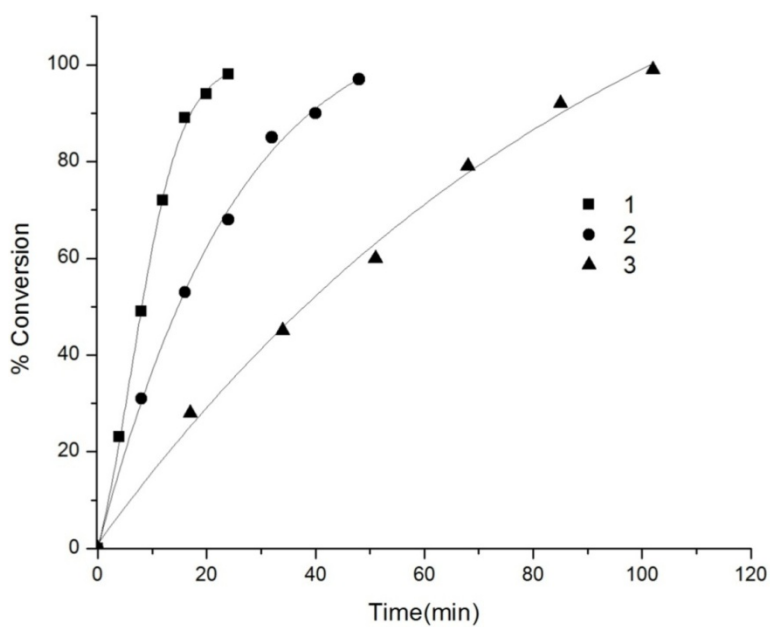

**Fig. S13** *rac*-LA conversion vs. time plot using **1**, **2** and **3**: [*rac*-LA]<sub>0</sub>/[Cat]<sub>0</sub> = 600 at 140 °C.

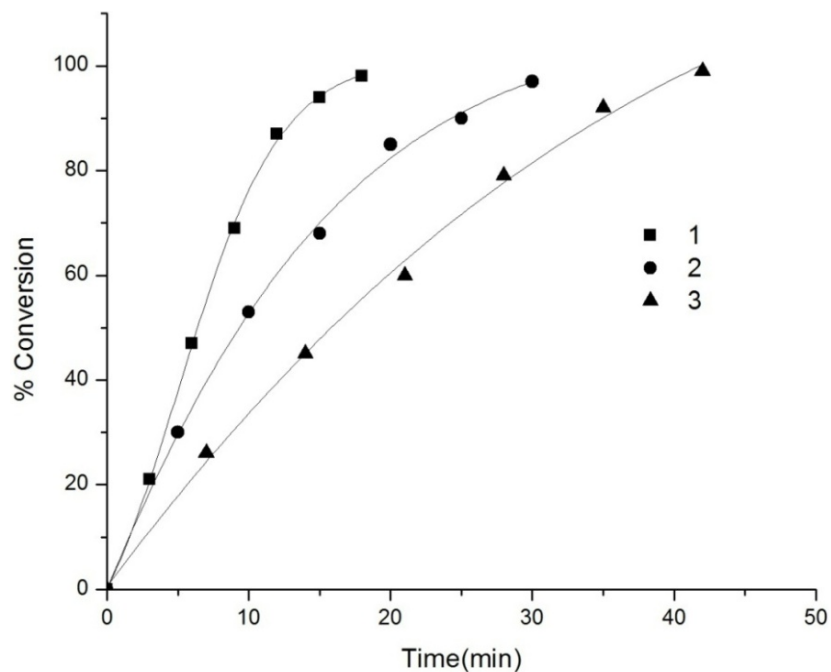

**Fig. S14**  $\epsilon$ -CL conversion vs. time plot using **1**, **2** and **3**:  $[\epsilon\text{-CL}]_0/[\text{Cat}]_0 = 200$  at  $80\text{ }^\circ\text{C}$ .

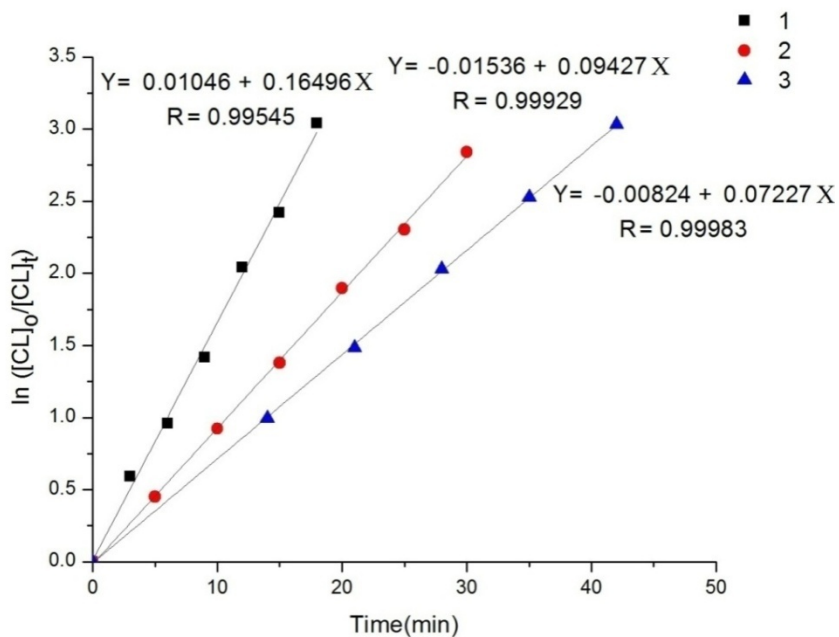

**Fig. S15** Semi-logarithmic plots of  $\epsilon$ -CL conversion in time initiated by **1**, **2** and **3**:  $[\epsilon\text{-CL}]_0/[\text{Cat}]_0 = 200$  at  $80\text{ }^\circ\text{C}$ .

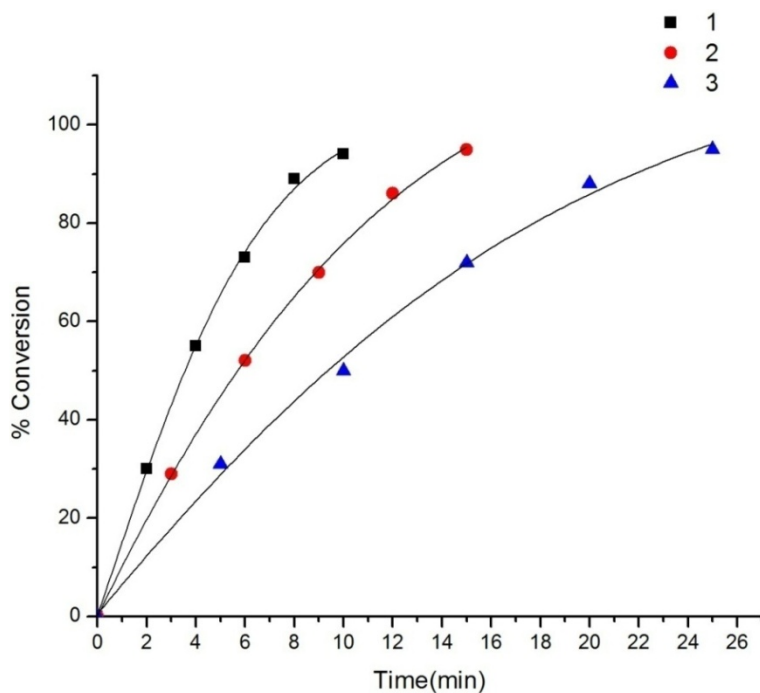

**Fig. S16** *rac*-LA conversion vs. time plot using **1**, **2** and **3**:  $[rac\text{-LA}]_0/[Cat]_0/[BnOH] = 200:1:5$  at 140 °C.

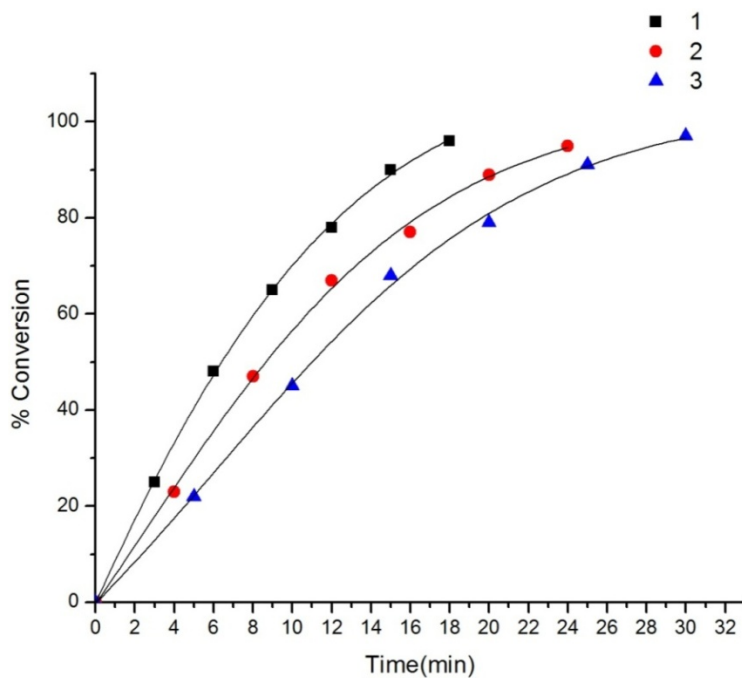

**Fig. S17**  $\epsilon$ -CL conversion vs. time plot using **1**, **2** and **3**:  $[\epsilon\text{-CL}]_0/[Cat]_0/[BnOH] = 200:1:5$  at 80 °C.

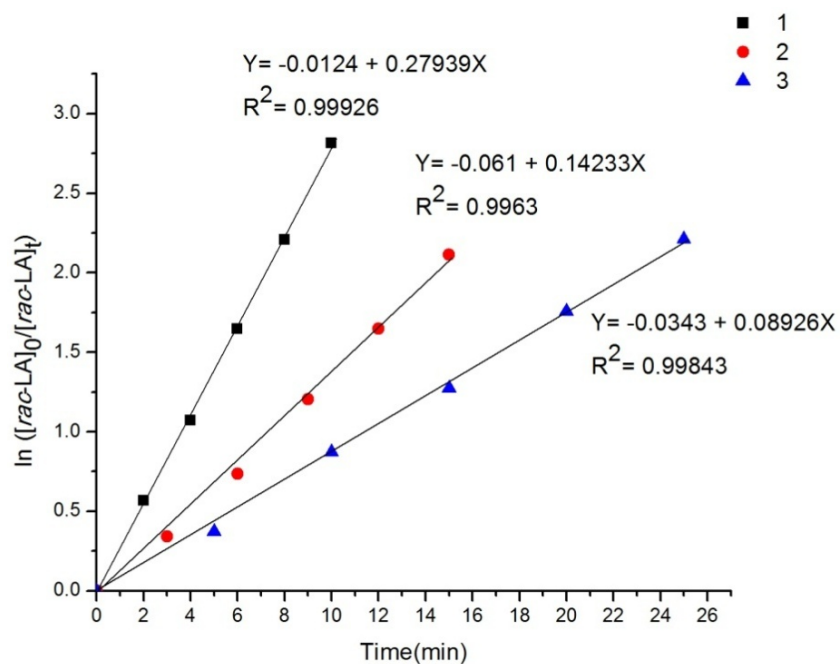

**Fig. S18** Semi-logarithmic plots of *rac*-LA conversion in time initiated by **1**, **2** and **3**:  $[\textit{rac}\text{-LA}]_0/[\text{Cat}]_0/[\text{BnOH}] = 200:1:5$  at 140 °C.

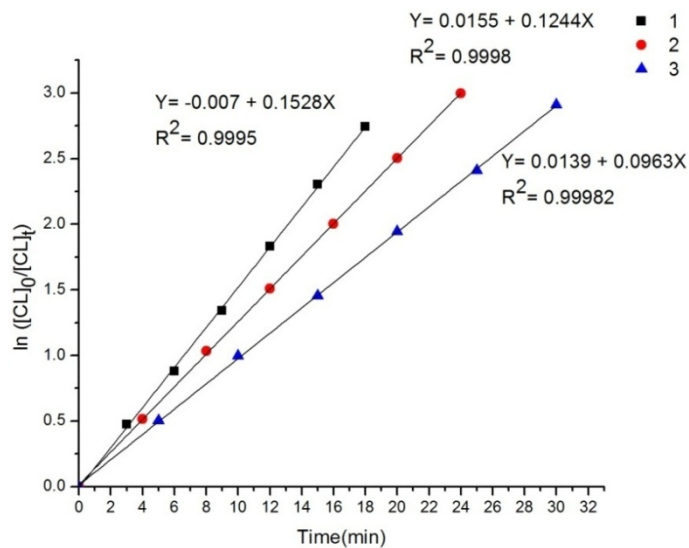

**Fig. S19** Semi-logarithmic plots of  $\epsilon$ -CL conversion in time initiated by **1**, **2** and **3**:  $[\epsilon\text{-CL}]_0/[\text{Cat}]_0/[\text{BnOH}] = 200:1:5$  at 80 °C.



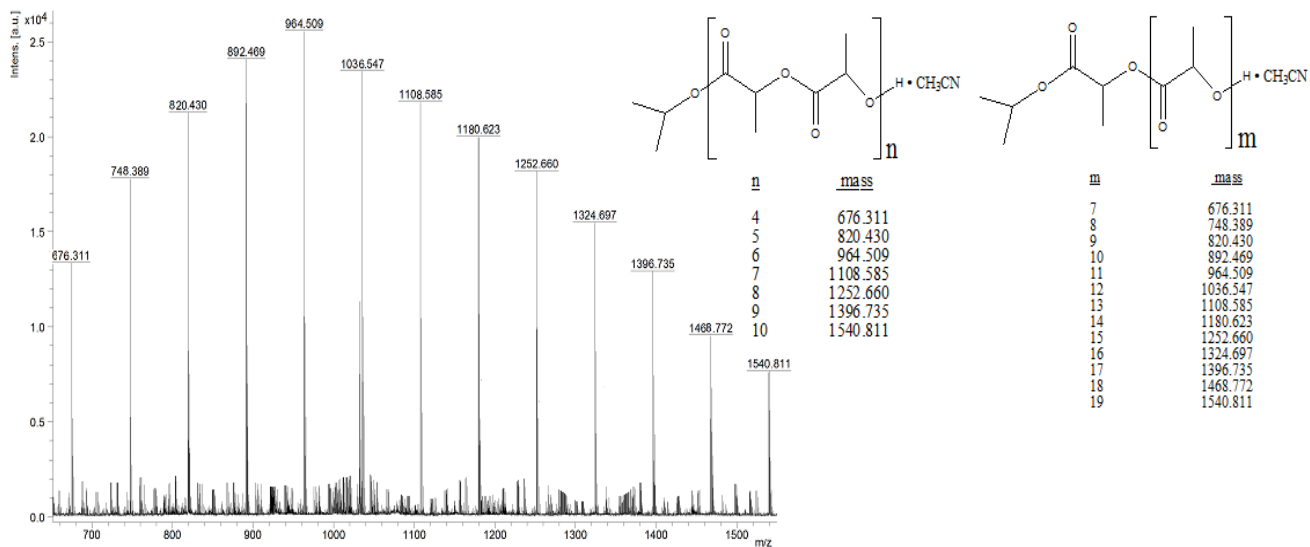

**Fig. S20** MALDI-TOF of the crude product obtained from a reaction between *rac*-LA and 1 in 15:1 ratio. For  $n = 4$ , peak at 676.311 is observed [ $144.14 \cdot 4 + 59$  (isopropoxide end group) + 41 ( $\text{CH}_3\text{CN}$  adduct)].

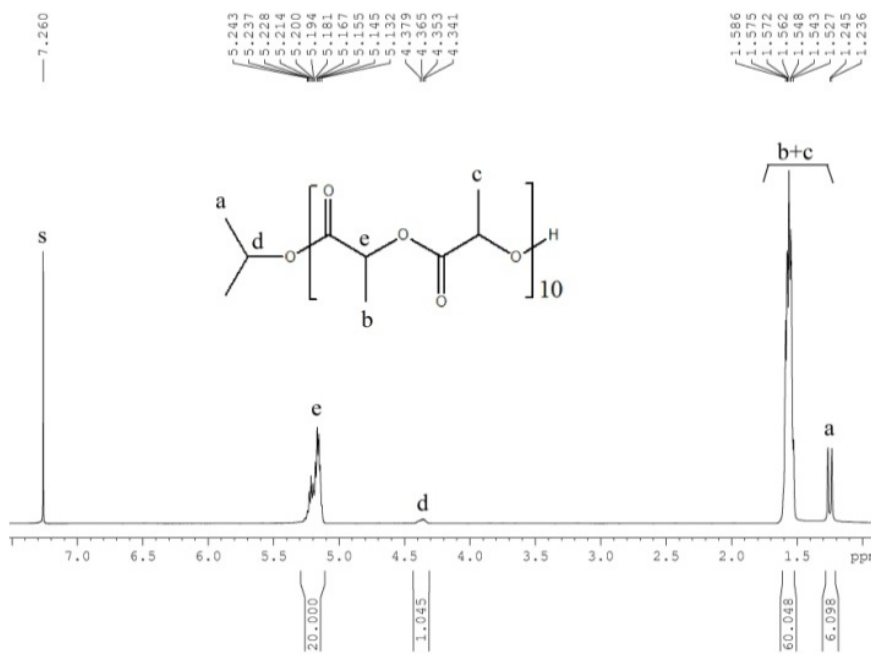

**Fig. S21**  $^1\text{H}$  NMR spectrum of the crude product obtained from a reaction between *rac*-LA and 1 in 15:1 ratio.

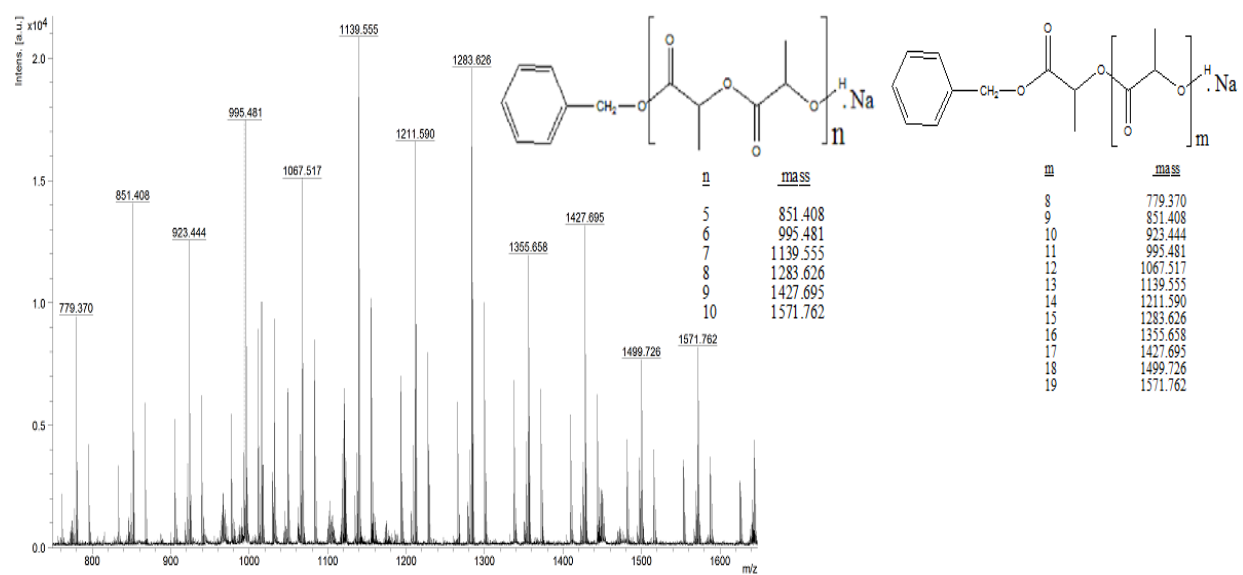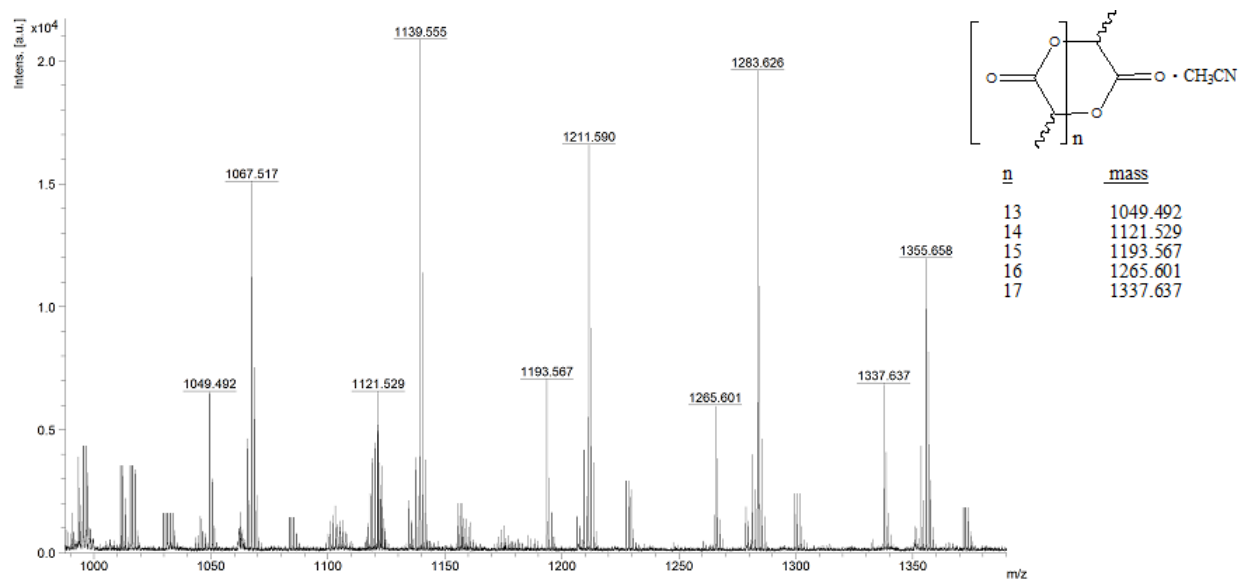

**Fig. S22** MALDI-TOF of the crude product obtained from a reaction between *rac*-LA and 1 in the presence of BnOH in ratio 15:1:2. For  $n = 13$ , peak at 1049.492 is observed [ $72 \cdot 13 + 72 + 41$  ( $\text{CH}_3\text{CN}$  adduct)].

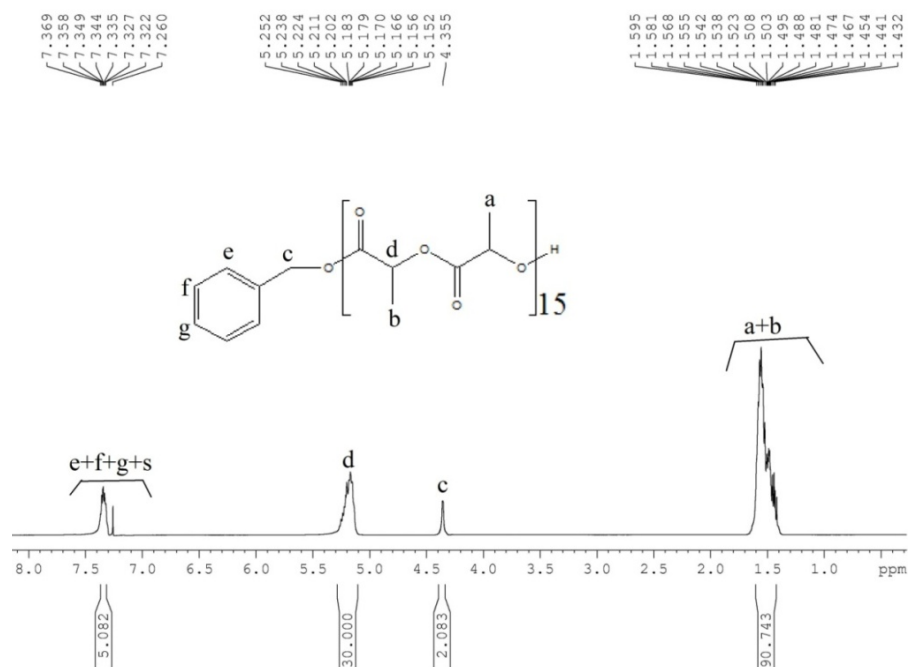

**Fig. S23**  $^1\text{H}$  NMR spectrum of the crude product obtained from a reaction between *rac*-LA and **1** in the presence of BnOH in ratio 15:1:2.

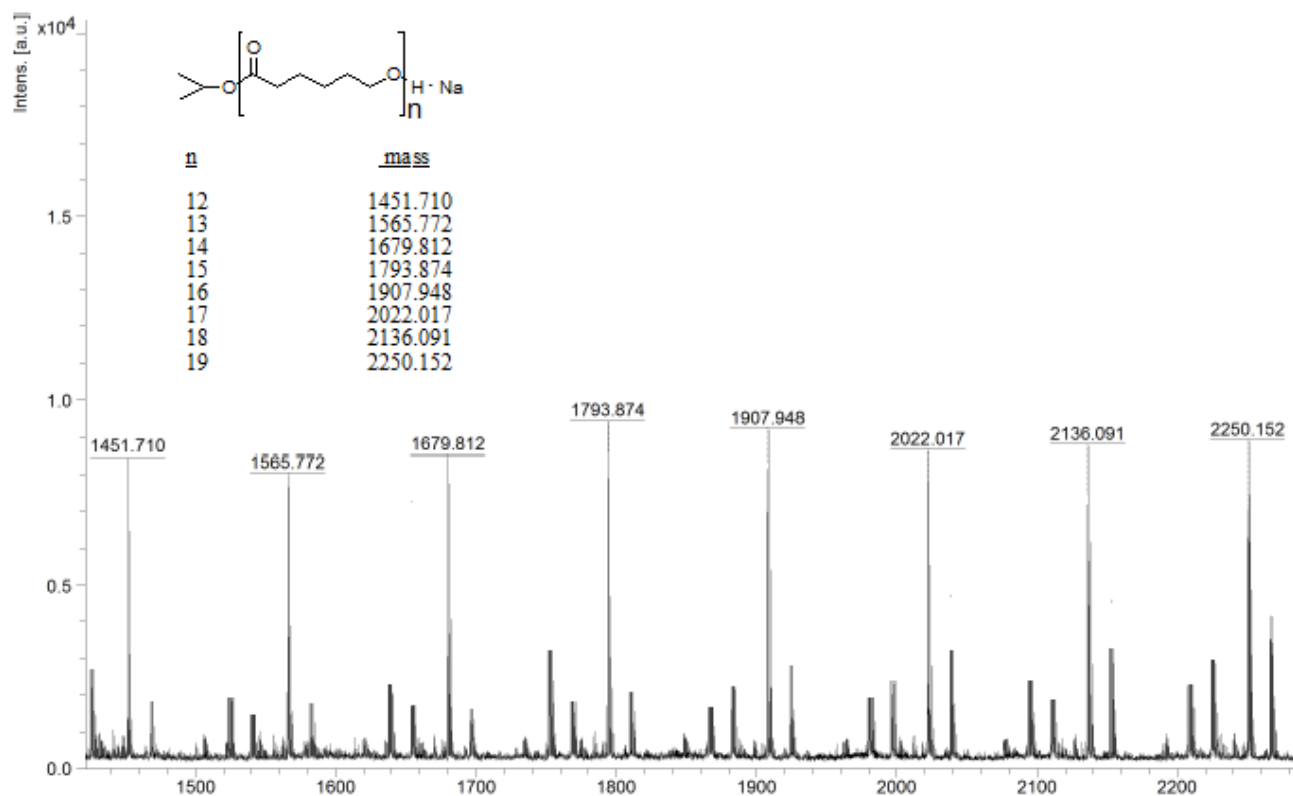

**Fig. S24** MALDI-TOF of the crude product obtained from a reaction between  $\epsilon$ -CL and **1** in 15:1 ratio.

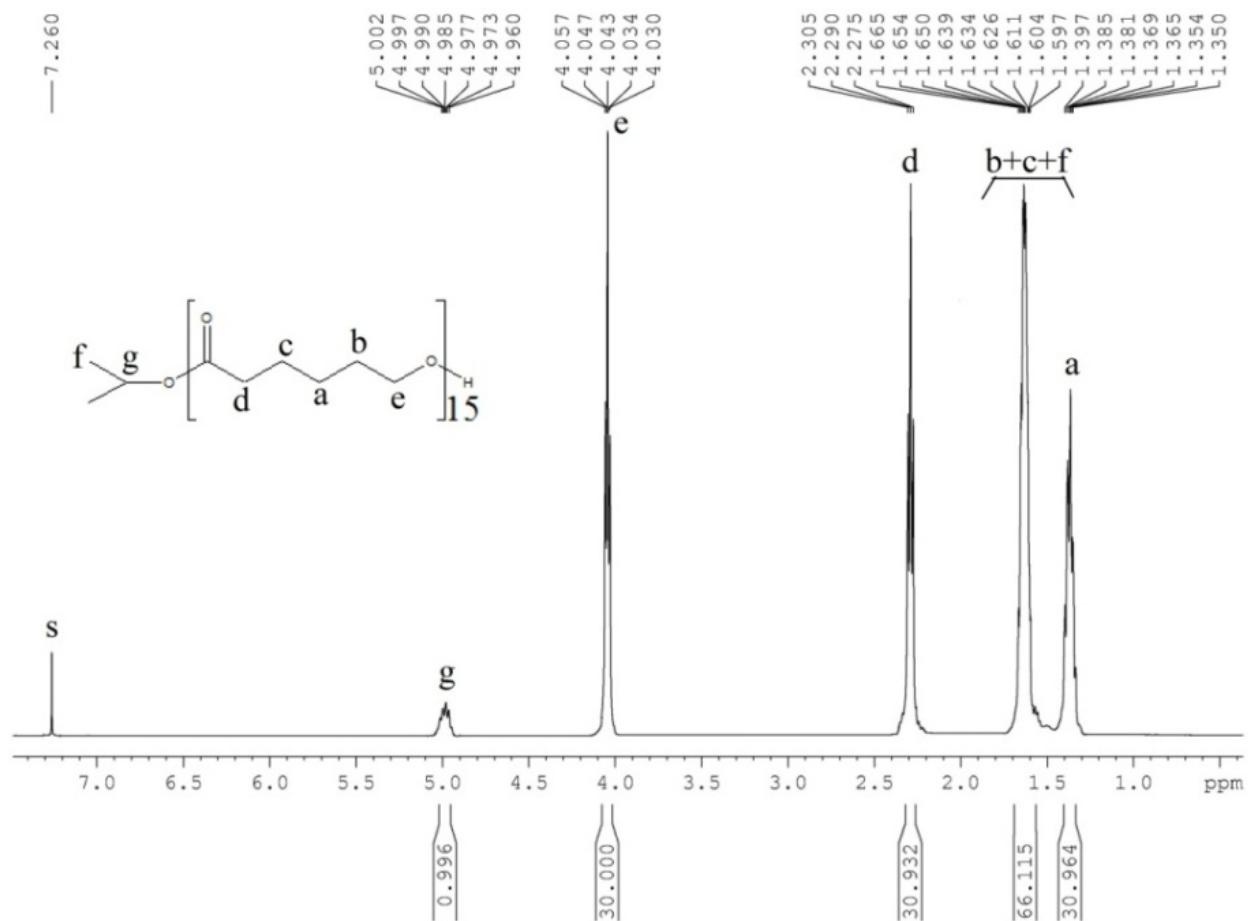

**Fig. S25**  $^1\text{H}$  NMR spectrum of the crude product obtained from a reaction between  $\varepsilon$ -CL and **1** in 15:1 ratio.

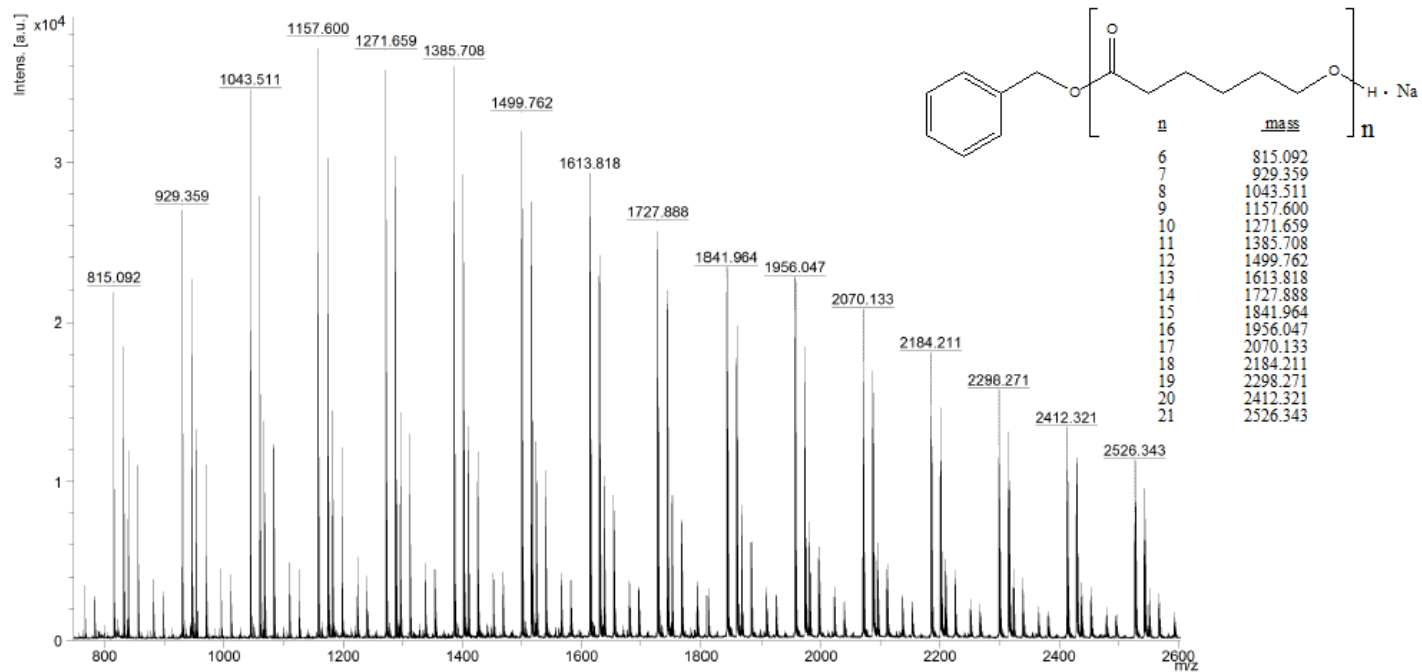

**Fig. S26** MALDI-TOF of the crude product obtained from a reaction between  $\epsilon$ -CL and **1** in the presence of BnOH in ratio 15:1:2.

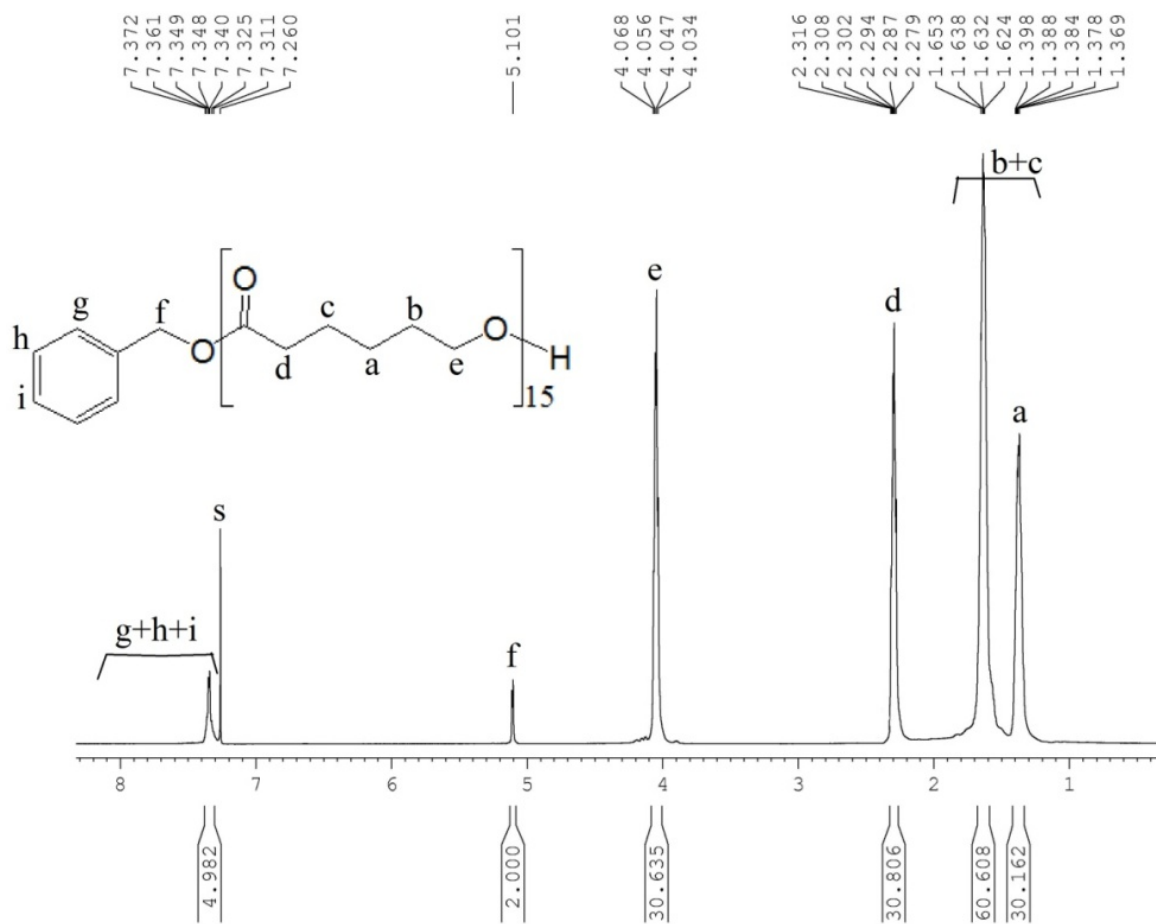

**Fig. S27** <sup>1</sup>H NMR spectrum of the crude product obtained from a reaction between  $\epsilon$ -CL and **1** in the presence of BnOH in ratio 15:1:2.

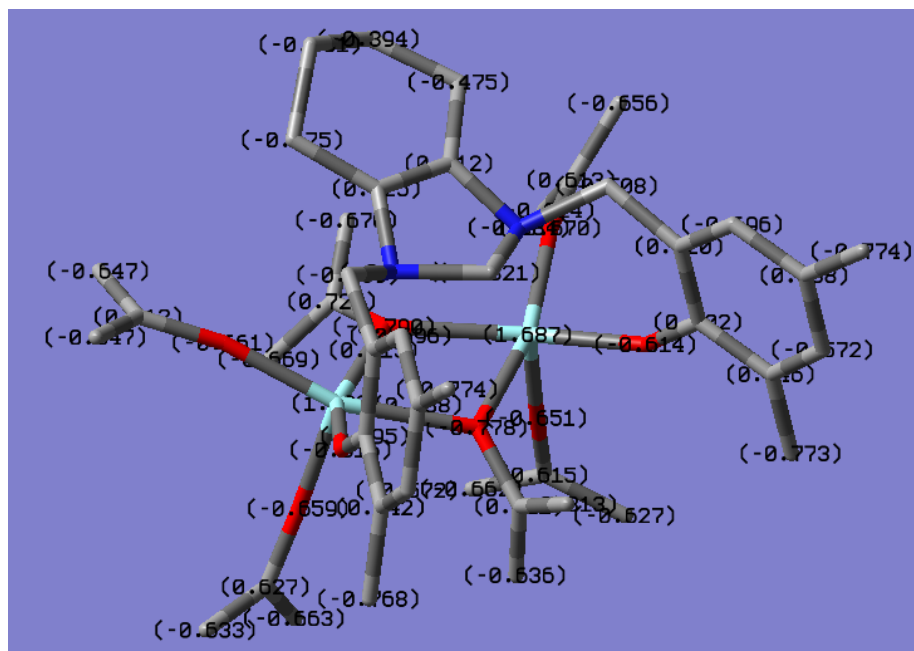

Complex 1

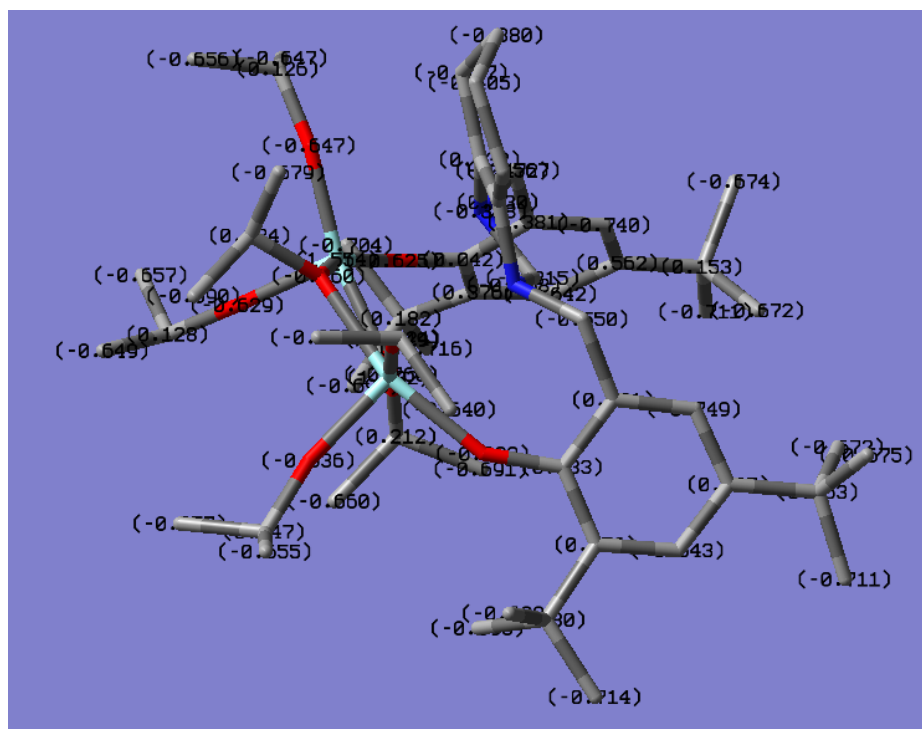

Complex 3

Fig. S28 Mulliken partial charges of complexes 1 and 3.

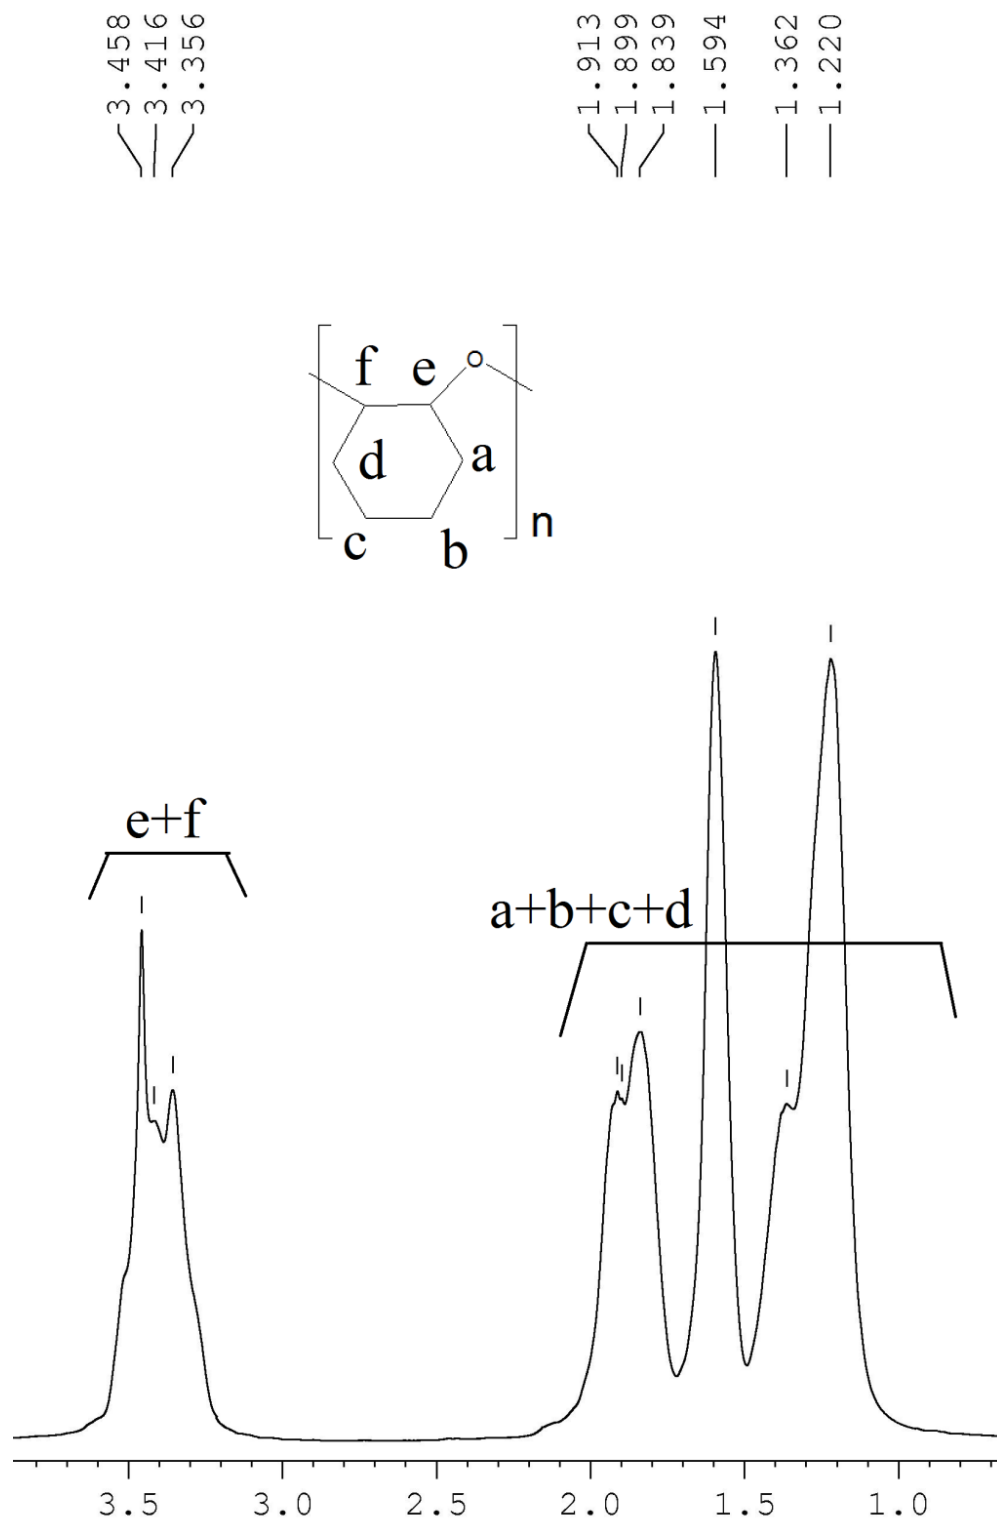

**Fig. S29**  $^1\text{H}$  NMR (500 MHz,  $\text{CDCl}_3$ ) of the crude product obtained from a reaction between CHO and **1** in 1000:1 ratio at 80 °C.



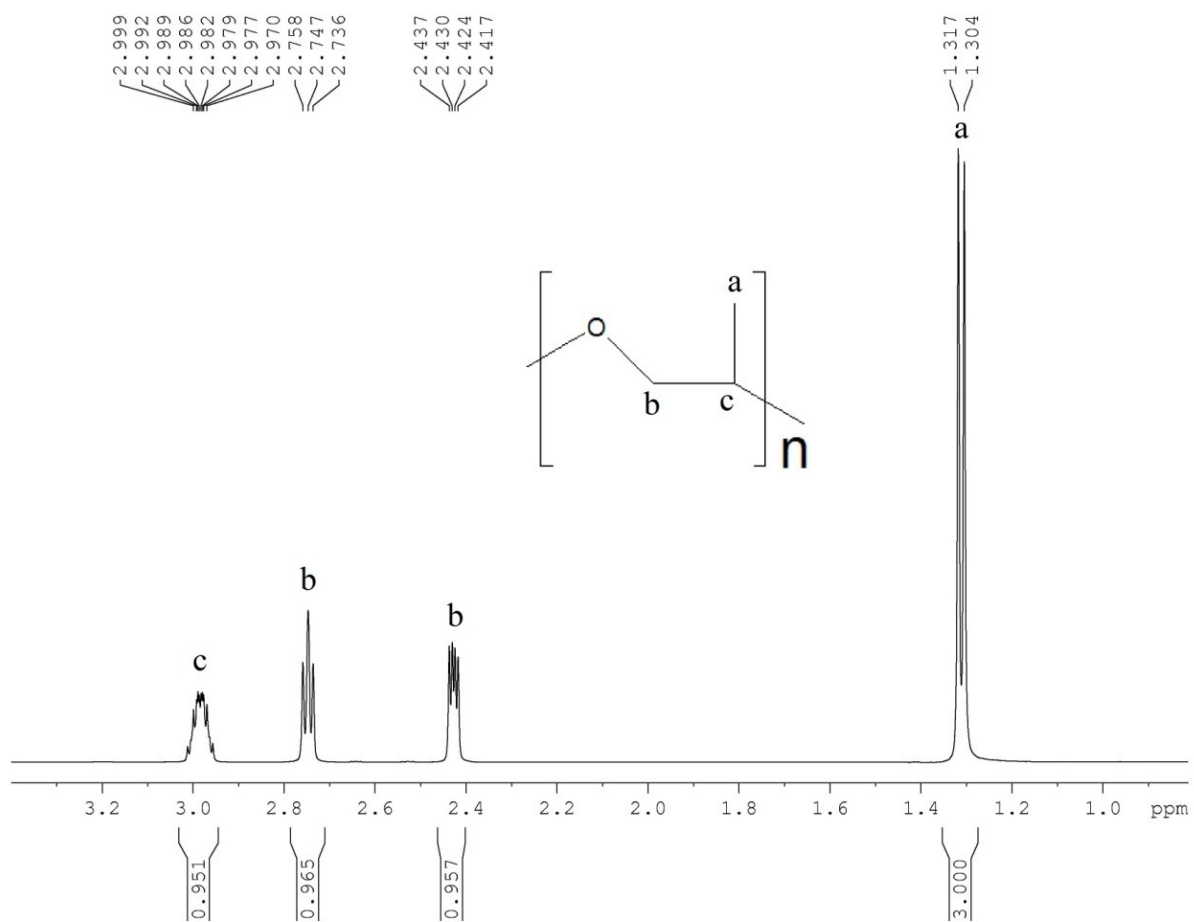

**Fig. S30**  $^1\text{H}$  NMR (500 MHz,  $\text{CDCl}_3$ ) of the crude product obtained from a reaction between PO and **1** in 1000:1 ratio at 30 °C.

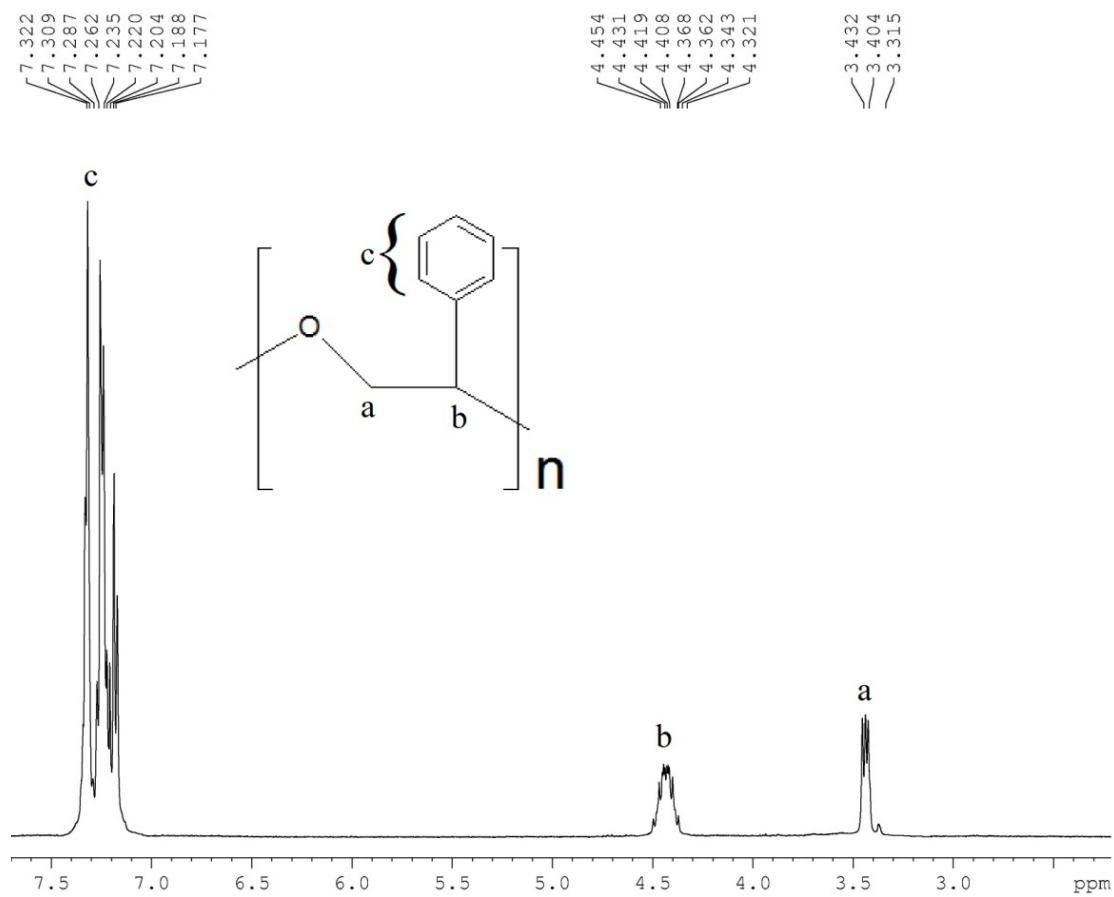

**Fig. S31** <sup>1</sup>H NMR (500 MHz, CDCl<sub>3</sub>) of the crude product obtained from a reaction between SO and **1** in 1000:1 ratio at 120 °C.

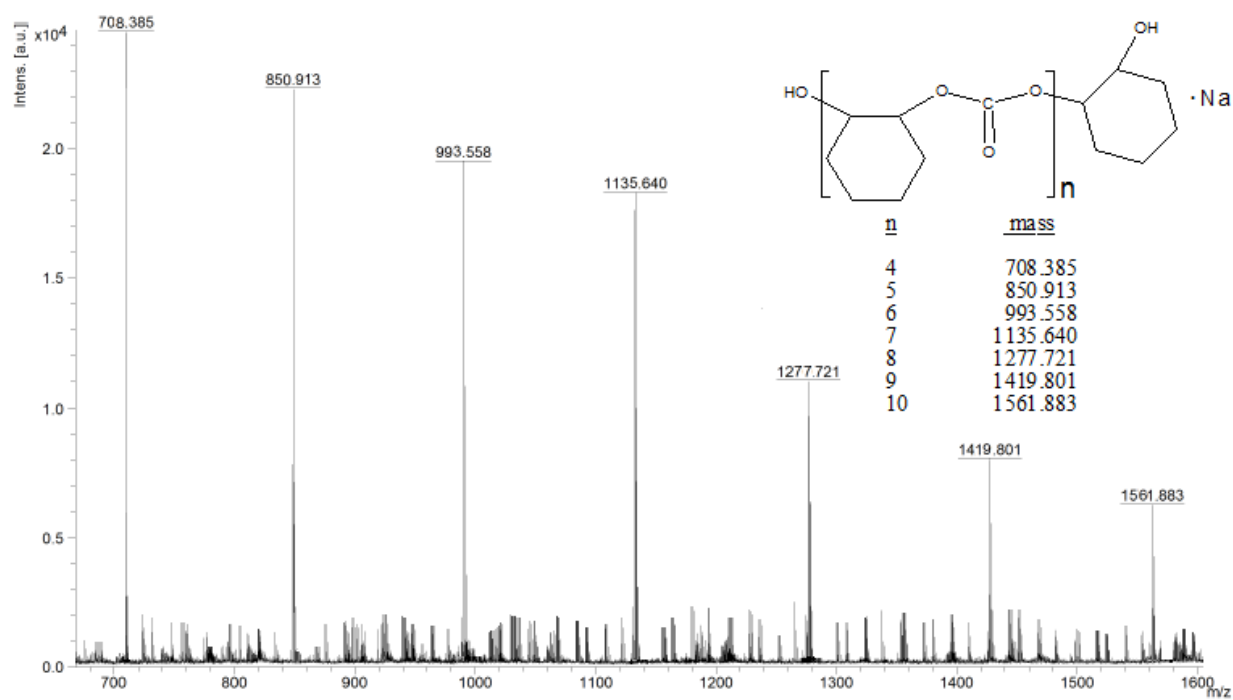

**Fig. S32** MALDI-TOF mass spectrum of PCHC sample produced by **1** at 50 °C and 35 bar CO<sub>2</sub> pressure from CHO and CO<sub>2</sub> using TBAB as cocatalyst.

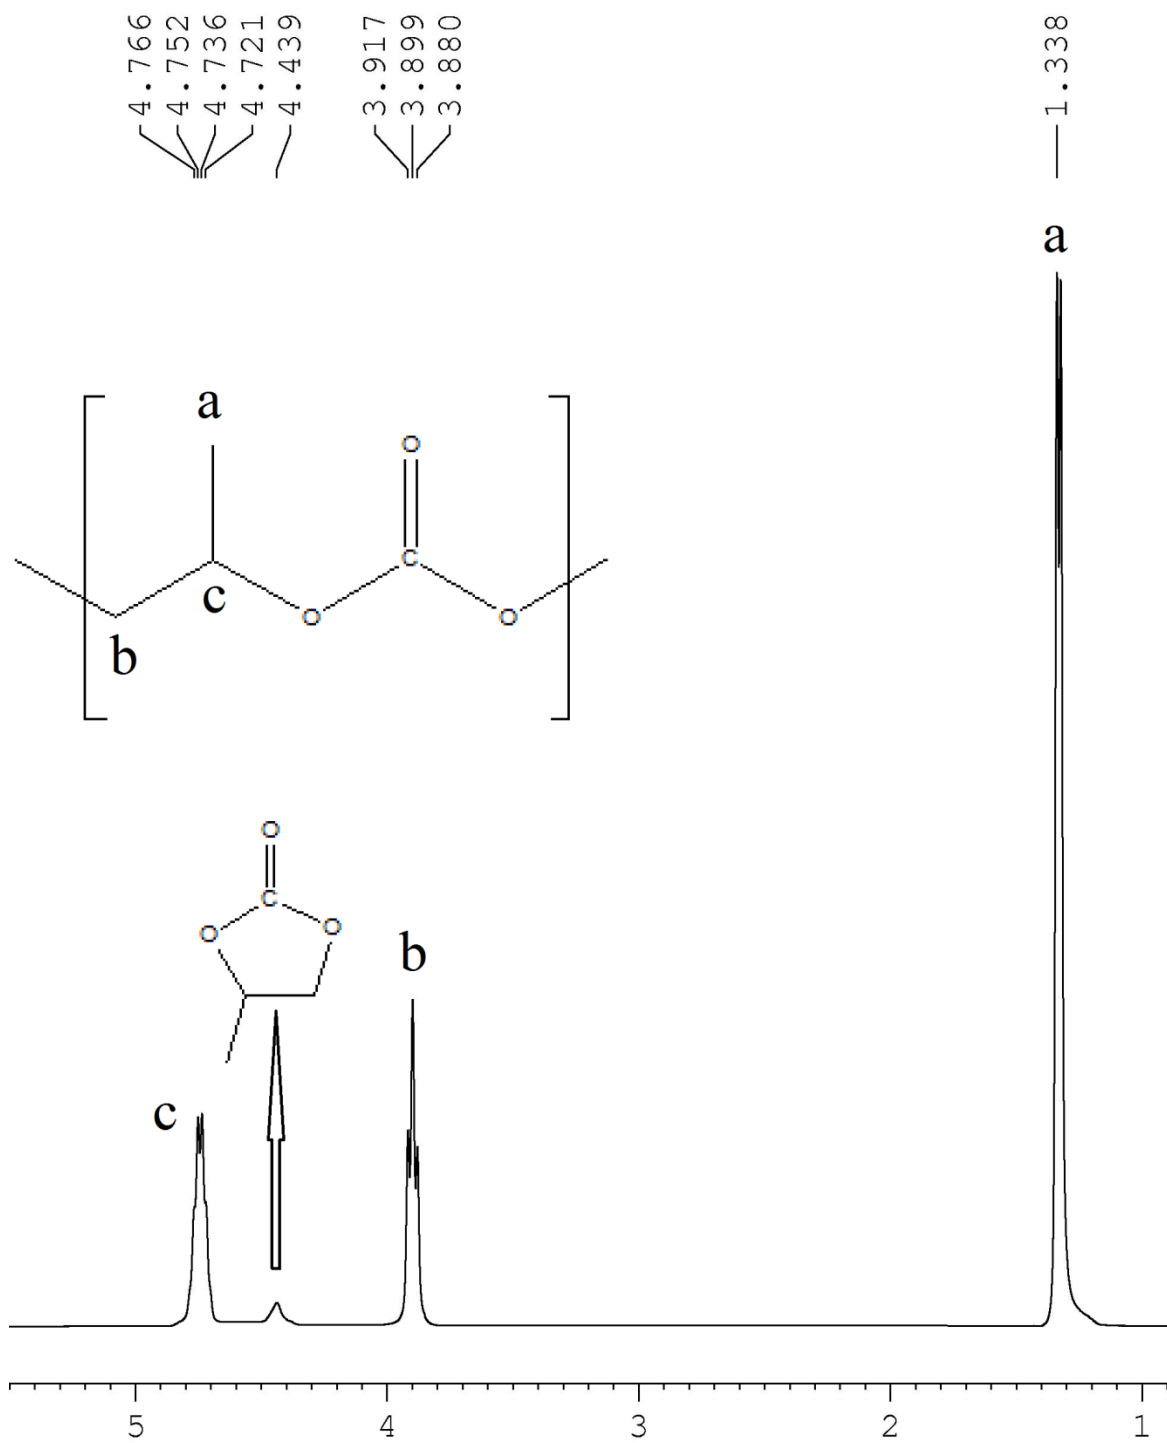

**Fig. S33** <sup>1</sup>H NMR (500 MHz, CDCl<sub>3</sub>) spectrum of a representative sample of poly(propylene carbonate).

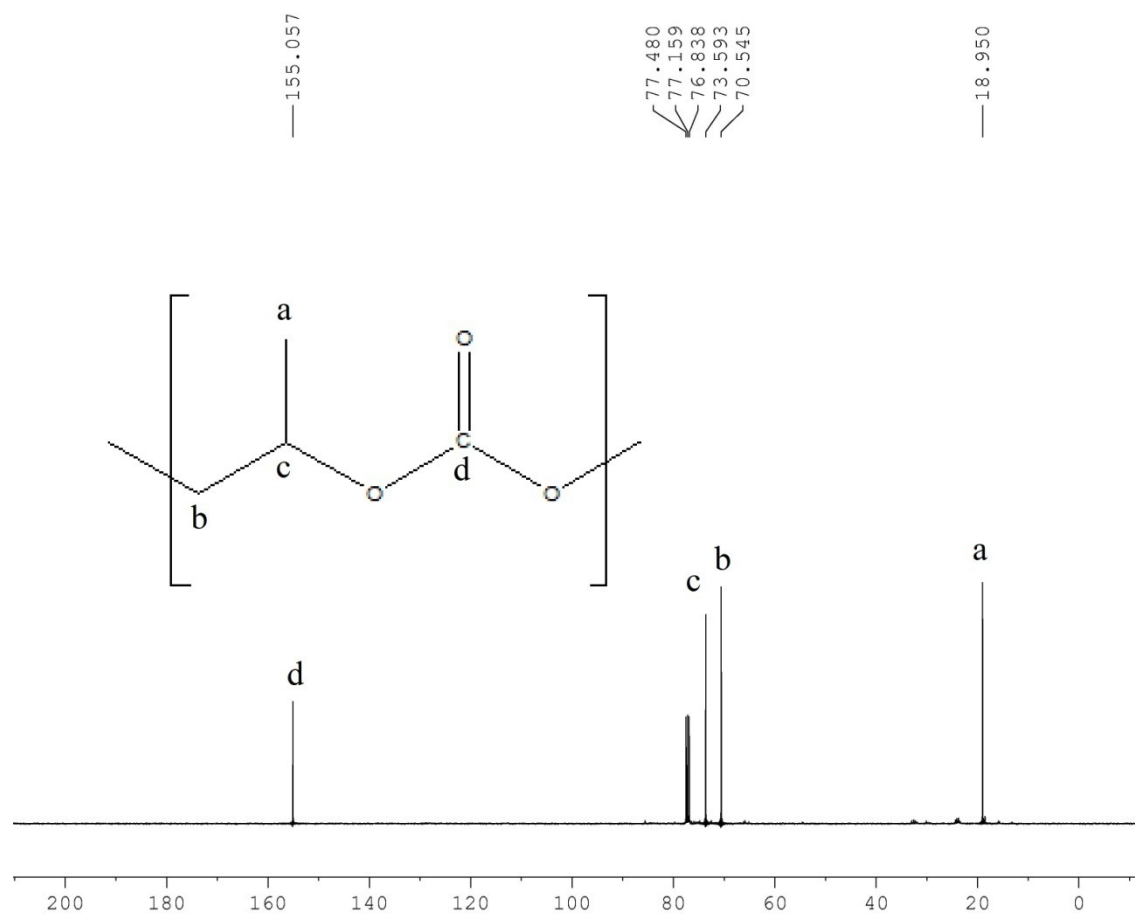

**Fig. S34** <sup>13</sup>C NMR (125 MHz, CDCl<sub>3</sub>) spectrum of a representative sample of poly(propylene carbonate).

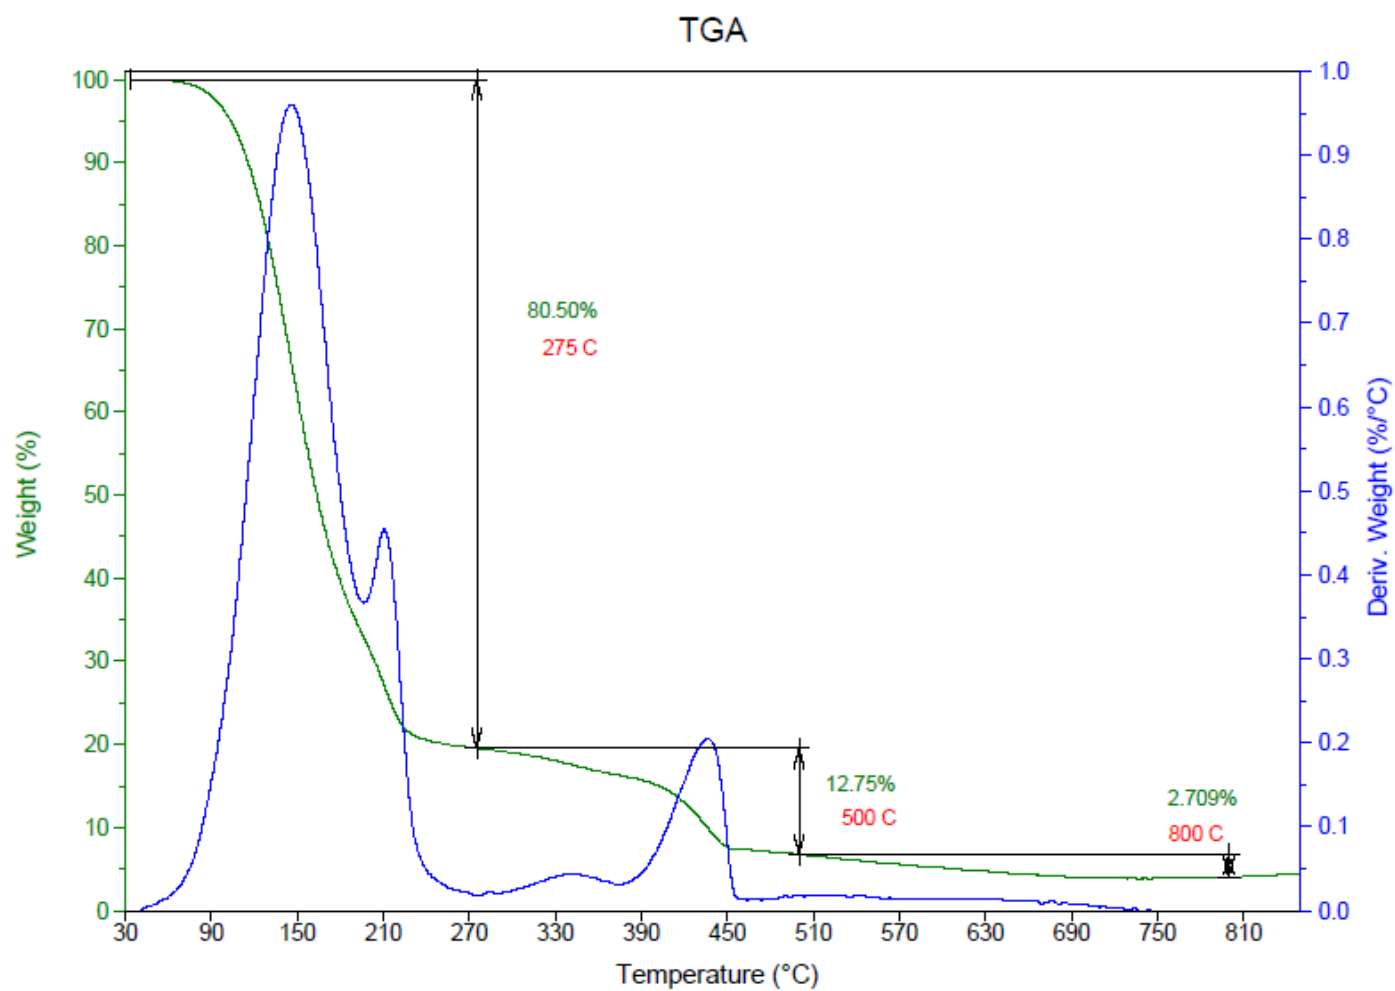

**Fig. S35** Representative TGA trace and derivative plot of PCHC produced by **1** (Table 4, entry 1).

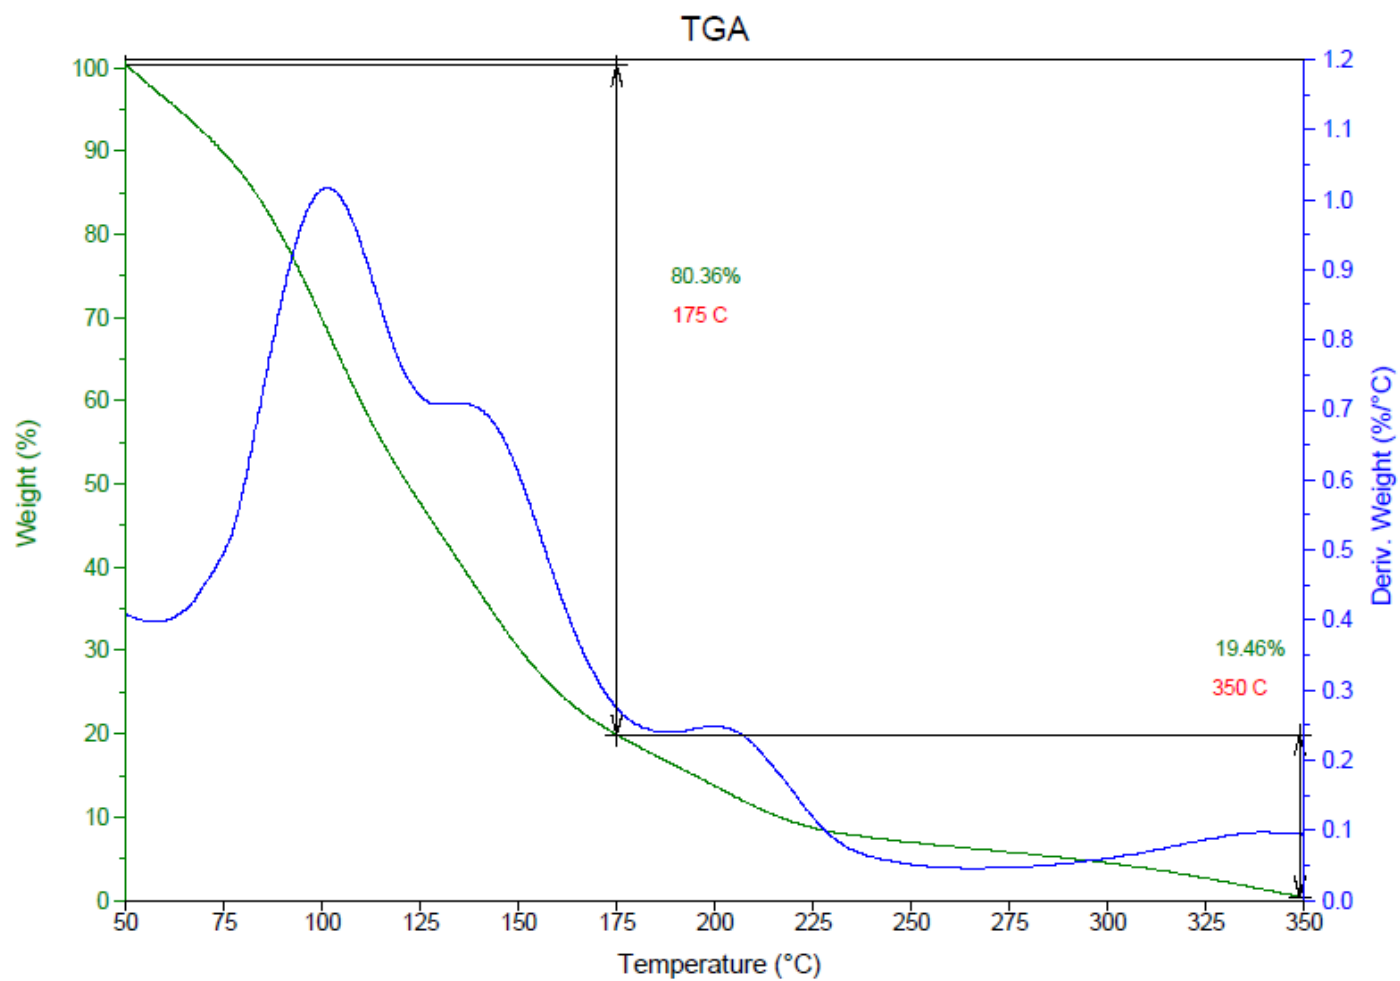

**Fig. S36** Representative TGA trace and derivative plot of PPC produced by **1** (Table 4, entry 4).

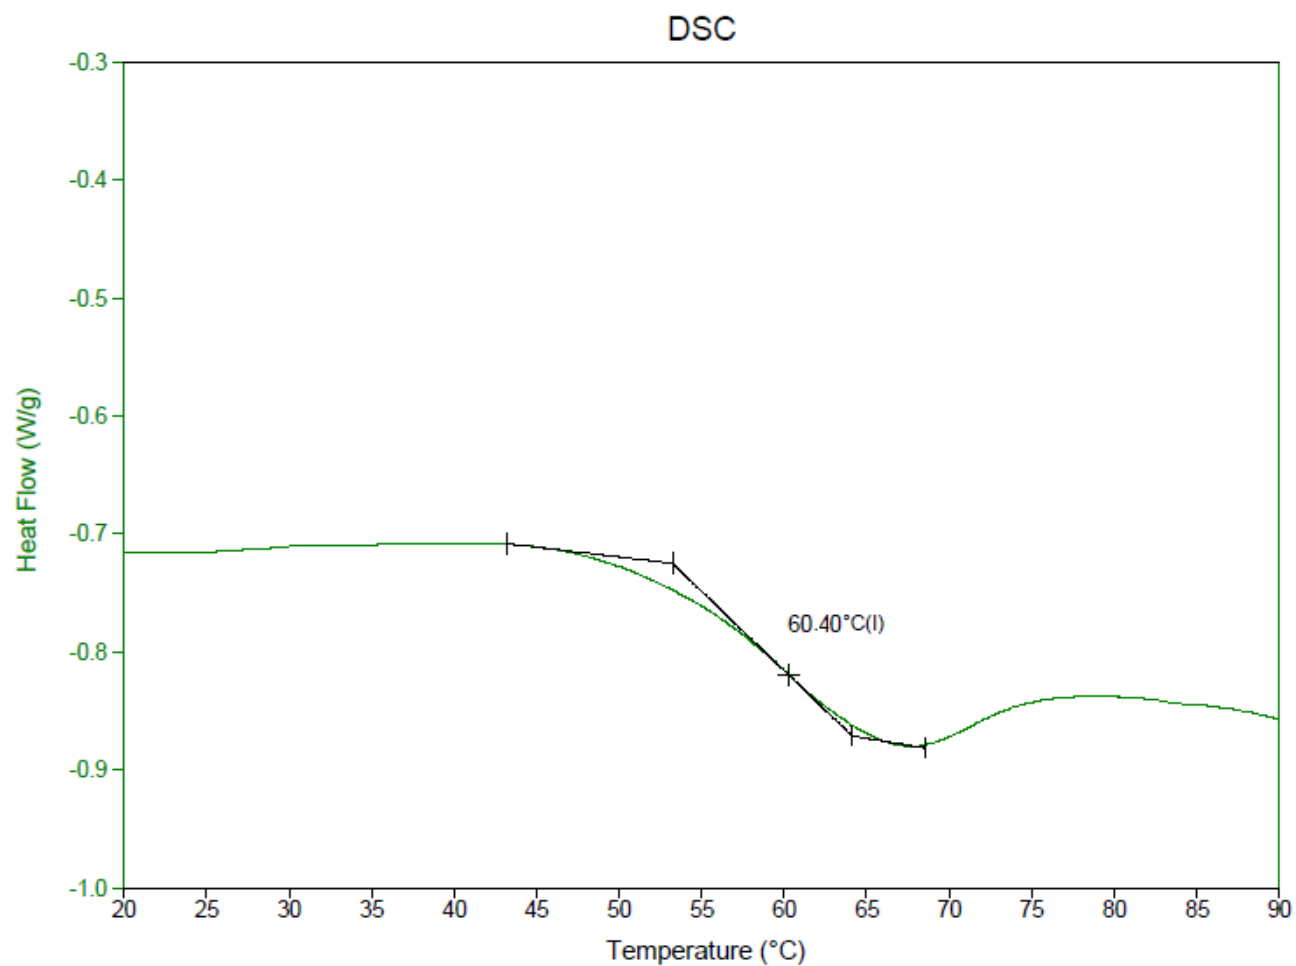

**Fig. S37** Representative DSC trace of PCHC produced by **1**, 2nd heat cycle (Table 4, entry 1).



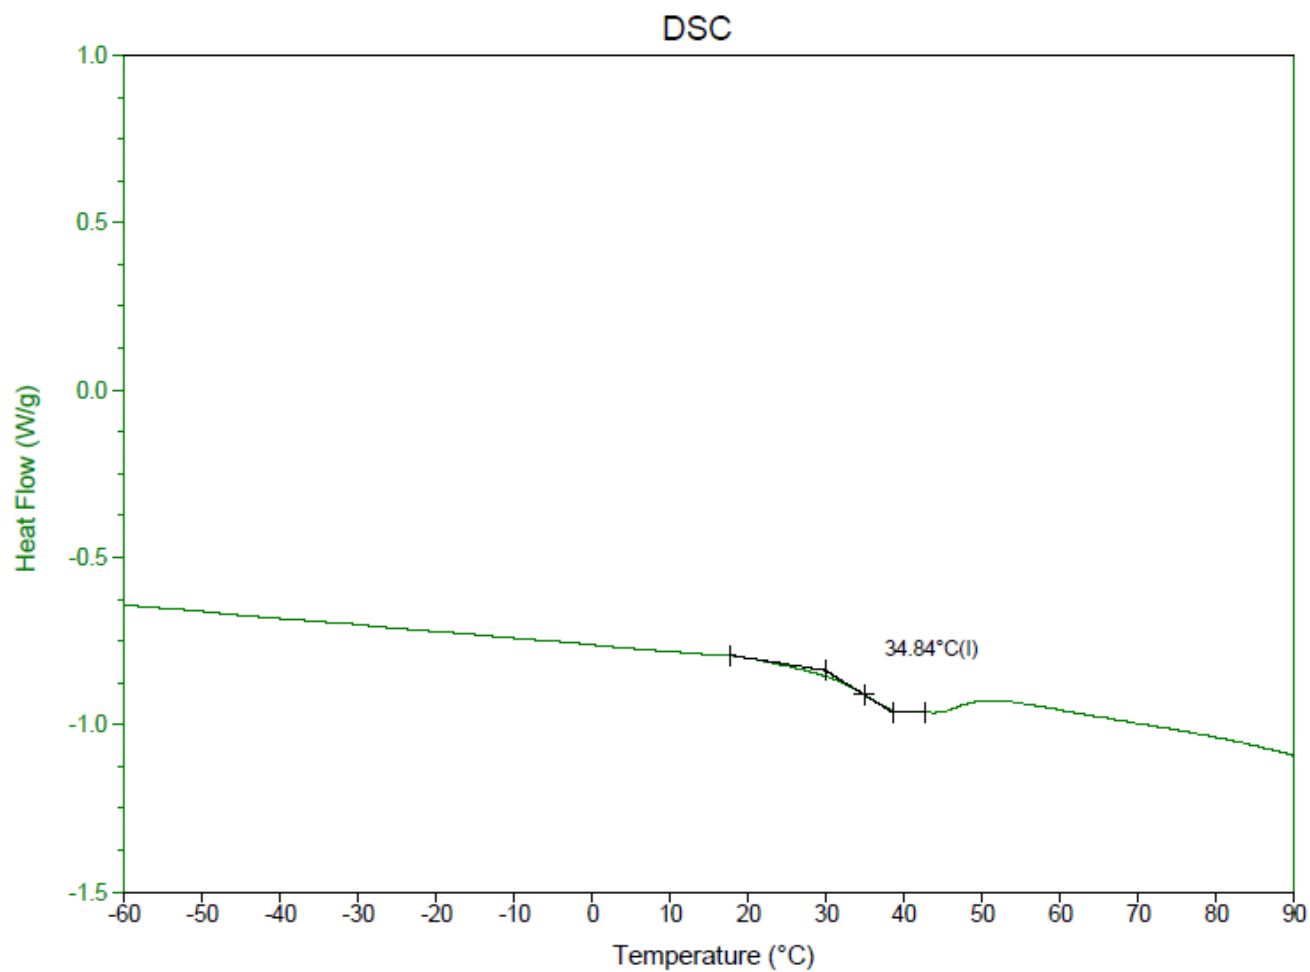

**Fig. S38** Representative DSC trace of PPC produced by **1**, 2nd heat cycle (Table 4, entry 4).

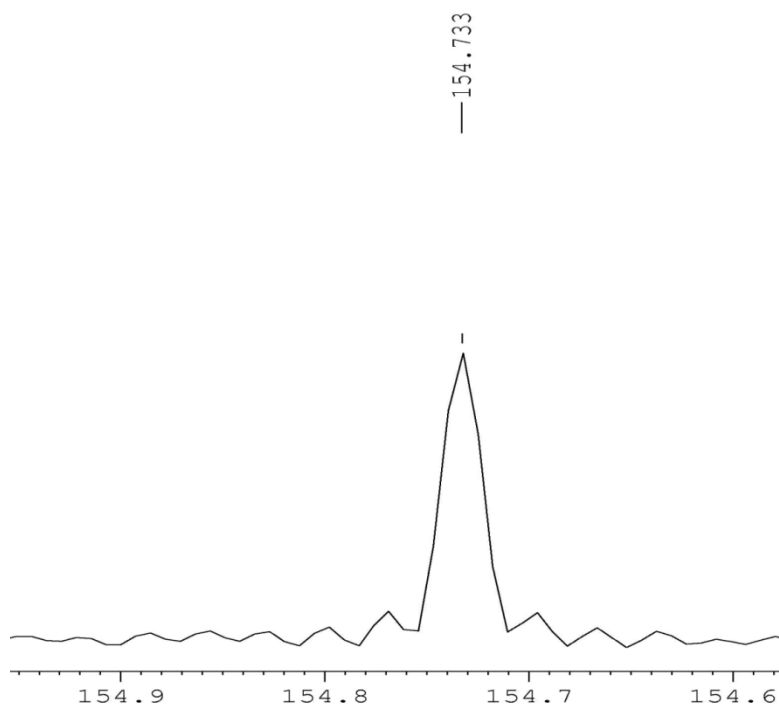

**Fig. S39** Carbonyl region of the  $^{13}\text{C}$ -NMR spectrum of styrene carbonate (SC) synthesized from the coupling of styrene oxide (SO) and  $\text{CO}_2$ .

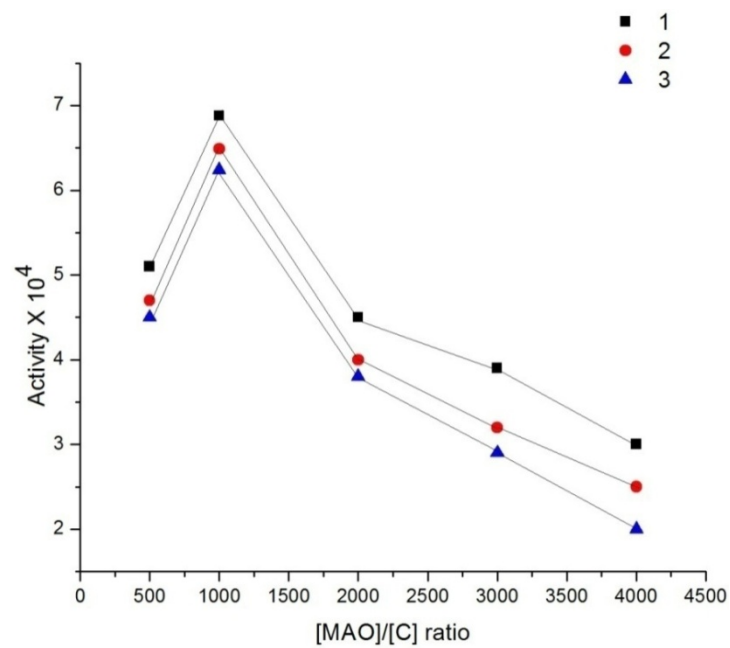

**Fig. S40** Plot of activity vs. [MAO]/[cat] ratio for **1**, **2** and **3** for ethylene polymerization.

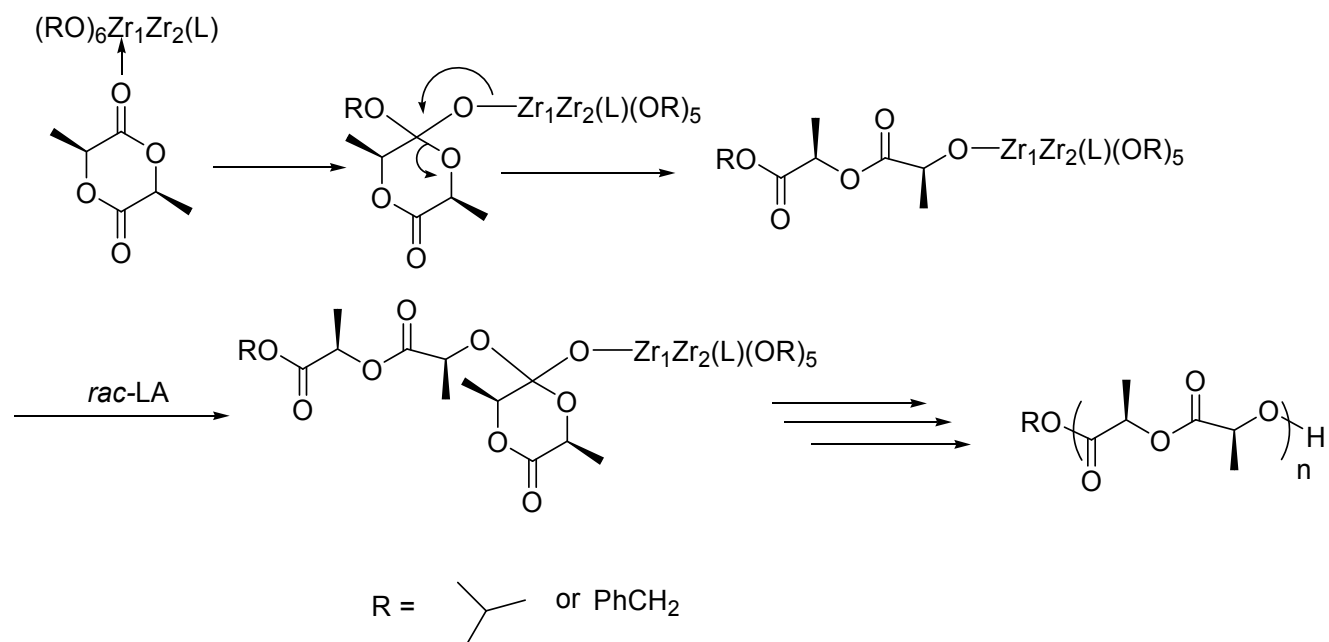

**Scheme S1** Polymerization proceeds through the coordination-insertion mechanism for *rac*-LA.

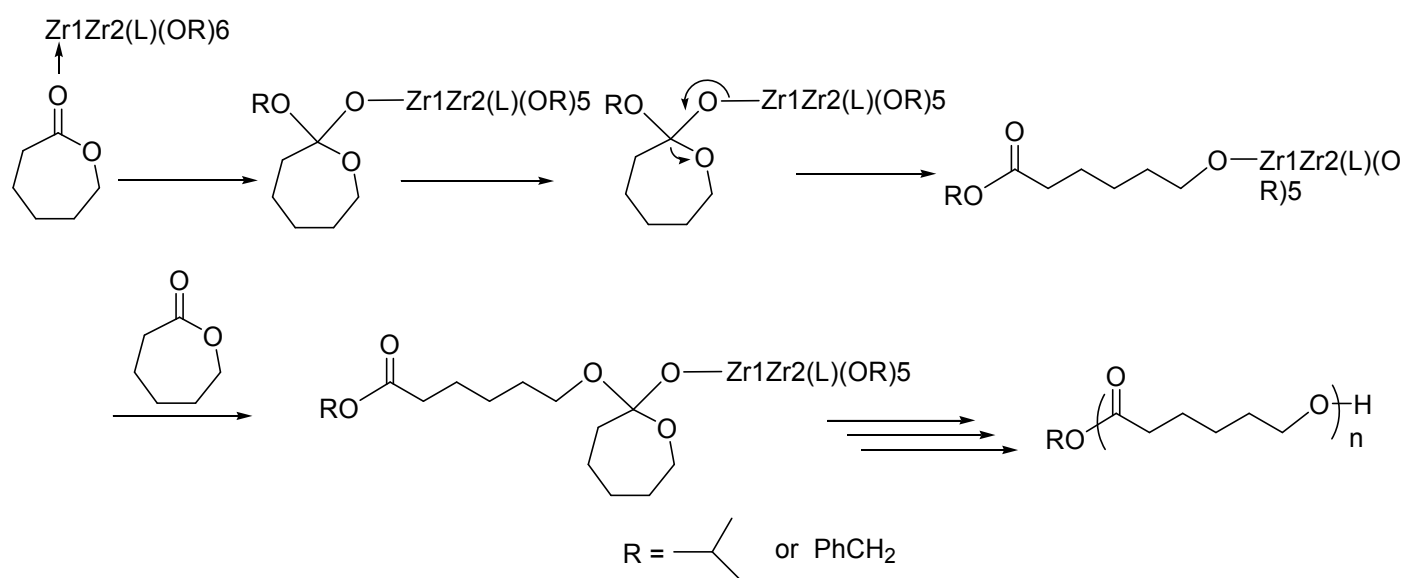

**Scheme S2** Polymerization proceeds through the coordination-insertion mechanism for  $\epsilon$ -CL.

**Table S1** Crystal data for the structures of **1**, **2** and **3**

| Compound                                          | <b>1</b>                                                                      | <b>2</b>                                                                      | <b>3</b>                                                                      |
|---------------------------------------------------|-------------------------------------------------------------------------------|-------------------------------------------------------------------------------|-------------------------------------------------------------------------------|
| Empirical formula                                 | C <sub>43</sub> H <sub>71</sub> N <sub>2</sub> O <sub>8</sub> Zr <sub>2</sub> | C <sub>49</sub> H <sub>86</sub> N <sub>2</sub> O <sub>8</sub> Zr <sub>2</sub> | C <sub>59</sub> H <sub>96</sub> N <sub>2</sub> O <sub>8</sub> Zr <sub>2</sub> |
| Formula weight                                    | 926.46                                                                        | 1013.64                                                                       | 1143.82                                                                       |
| Crystal system                                    | Monoclinic                                                                    | Monoclinic                                                                    | Triclinic                                                                     |
| Space group                                       | <i>P2(1)/n</i>                                                                | <i>P21/c</i>                                                                  | <i>P1</i>                                                                     |
| Temp/K                                            | 298(2)                                                                        | 296(2)                                                                        | 298(2)                                                                        |
| Wavelength (Å)                                    | 0.71073                                                                       | 0.71073                                                                       | 0.71073                                                                       |
| <i>a</i> (Å)                                      | 11.9483(4)                                                                    | 16.8978(5)                                                                    | 11.1760(3)                                                                    |
| <i>b</i> (Å)                                      | 21.6468(7)                                                                    | 13.4806(4)                                                                    | 11.3344(3)                                                                    |
| <i>c</i> (Å)                                      | 19.0429(5)                                                                    | 24.3958(7)                                                                    | 26.2444(8)                                                                    |
| $\alpha$ (°)                                      | 90                                                                            | 90                                                                            | 94.360(2)                                                                     |
| $\beta$ (°)                                       | 101.575(2)                                                                    | 102.6790(10)                                                                  | 101.224(2)                                                                    |
| $\gamma$ (°)                                      | 90                                                                            | 90                                                                            | 100.485(2)                                                                    |
| <i>V</i> (Å <sup>3</sup> )                        | 4825.1(3)                                                                     | 5421.7(3)                                                                     | 3184.95(15)                                                                   |
| <i>Z</i>                                          | 4                                                                             | 4                                                                             | 2                                                                             |
| <i>D</i> <sub>calc</sub> (g/cm <sup>3</sup> )     | 1.275                                                                         | 1.242                                                                         | 1.193                                                                         |
| Reflns collected                                  | 29680                                                                         | 45770                                                                         | 38478                                                                         |
| No. of indepreflns                                | 8488                                                                          | 9539                                                                          | 11145                                                                         |
| GOF                                               | 1.047                                                                         | 0.853                                                                         | 1.195                                                                         |
| Final <i>R</i> indices( <i>I</i> >2σ( <i>I</i> )) | <i>R</i> <sub>1</sub> = 0.0409,<br><i>wR</i> <sub>2</sub> = 0.1007            | <i>R</i> <sub>1</sub> = 0.0473,<br><i>wR</i> <sub>2</sub> = 0.1374            | <i>R</i> <sub>1</sub> = 0.0472,<br><i>wR</i> <sub>2</sub> = 0.1464            |
| <i>R</i> indices (all data)                       | <i>R</i> <sub>1</sub> = 0.0678,<br><i>wR</i> <sub>2</sub> = 0.1230            | <i>R</i> <sub>1</sub> = 0.0615,<br><i>wR</i> <sub>2</sub> = 0.1613            | <i>R</i> <sub>1</sub> = 0.0684,<br><i>wR</i> <sub>2</sub> = 0.1672            |

$$R_I = \sum |F_0| - |F_c| / \sum |F_0|, wR_2 = [\sum (F_0^2 - F_c^2)^2 / \sum w(F_0^2)^2]^{1/2}$$

**Table S2** Solution polymerization data for *rac*-LA and  $\epsilon$ -CL using **1–3** in the presence of benzyl alcohol in 200:1:5 (monomer: catalyst: benzyl alcohol) ratio.

| Entry | Initiator | Monomer        | T / °C | Yield (%) | <sup>a</sup> Time/min | <sup>b</sup> TOF/min | <sup>c</sup> <i>M<sub>n</sub></i> <sup>obs</sup> /kgmol <sup>-1</sup> | <sup>d</sup> <i>M<sub>n</sub></i> <sup>theo</sup> /kgmol <sup>-1</sup> | <i>M<sub>w</sub></i> / <i>M<sub>n</sub></i> | <sup>e</sup> <i>P<sub>r</sub></i> |
|-------|-----------|----------------|--------|-----------|-----------------------|----------------------|-----------------------------------------------------------------------|------------------------------------------------------------------------|---------------------------------------------|-----------------------------------|
| 1     | <b>1</b>  | <i>rac</i> -LA | 140    | 98        | 11                    | 3.6                  | 6.89                                                                  | 5.87                                                                   | 1.05                                        | 0.72                              |
| 2     | <b>2</b>  | <i>rac</i> -LA | 140    | 99        | 16                    | 2.5                  | 6.81                                                                  | 5.87                                                                   | 1.09                                        | 0.71                              |
| 3     | <b>3</b>  | <i>rac</i> -LA | 140    | 99        | 27                    | 1.5                  | 6.02                                                                  | 5.87                                                                   | 1.10                                        | 0.73                              |
| 4     | <b>1</b>  | $\epsilon$ -CL | 80     | 97        | 19                    | 2.0                  | 6.73                                                                  | 4.67                                                                   | 1.08                                        |                                   |
| 5     | <b>2</b>  | $\epsilon$ -CL | 80     | 98        | 25                    | 1.6                  | 5.55                                                                  | 4.67                                                                   | 1.13                                        |                                   |
| 6     | <b>3</b>  | $\epsilon$ -CL | 80     | 98        | 31                    | 1.3                  | 5.69                                                                  | 4.67                                                                   | 1.11                                        |                                   |

<sup>a</sup>Time of polymerization measured by quenching the polymerization reaction when all monomer was found consumed. <sup>b</sup>Turnover frequency (TOF) = Number of moles of monomer consumed / (mole of catalyst × time of polymerization). <sup>c</sup>Measured by GPC at 27 °C in THF relative to polystyrene standards with Mark-Houwink corrections for *M<sub>n</sub>* for  $\epsilon$ -CL and LA polymerization. <sup>d</sup>*M<sub>n</sub>* (theoretical) at 100 % conversion = [M]<sub>0</sub>/[C]<sub>0</sub> × mol wt (monomer) + mol wt (BnOH). <sup>e</sup>Calculated from homonuclear decoupled <sup>1</sup>H NMR spectrum.

**Table S3** Computed Mulliken Net charges (Q/e) on various atoms of complexes **1** and **3**

| Complex                        | Positions                      | Mulliken Charge (Q/e) |
|--------------------------------|--------------------------------|-----------------------|
| <b>1</b>                       | Ph-O (1)                       | -0.615                |
|                                | Ph-O (2)                       | -0.614                |
|                                | <sup>i</sup> Pr-O (terminal 1) | -0.651                |
|                                | <sup>i</sup> Pr-O (terminal 2) | -0.659                |
|                                | <sup>i</sup> Pr-O (terminal 3) | -0.661                |
|                                | <sup>i</sup> Pr-O (terminal 4) | -0.670                |
|                                | <sup>i</sup> Pr-O (bridging 1) | -0.778                |
|                                | <sup>i</sup> Pr-O (bridging 2) | -0.790                |
|                                | Ph-O (1)                       | -0.625                |
|                                | Ph-O (2)                       | -0.632                |
| <sup>i</sup> Pr-O (terminal 1) | -0.629                         |                       |

---

|          |                                    |        |
|----------|------------------------------------|--------|
| <b>3</b> | <i>i</i> Pr- <i>O</i> (terminal 2) | -0.636 |
|          | <i>i</i> Pr- <i>O</i> (terminal 3) | -0.647 |
|          | <i>i</i> Pr- <i>O</i> (terminal 4) | -0.649 |
|          | <i>i</i> Pr- <i>O</i> (bridging 1) | -0.760 |
|          | <i>i</i> Pr- <i>O</i> (bridging 2) | -0.760 |

---
